# Supplementary material for: Toward a glycyl radical enzyme containing synthetic bacterial microcompartment to produce pyruvate from formate and acetate
Source: PubMed Central journal article supplement — Proc Natl Acad Sci U S A. 2022 Feb 22;119(8):e2116871119. doi: 10.1073/pnas.2116871119 (PMC8872734; doi:10.1073/pnas.2116871119), 2022-02-22
Supplement: pnas.2116871119.sapp.pdf [file pnas.2116871119.sapp.pdf]

## Supplemental Figures

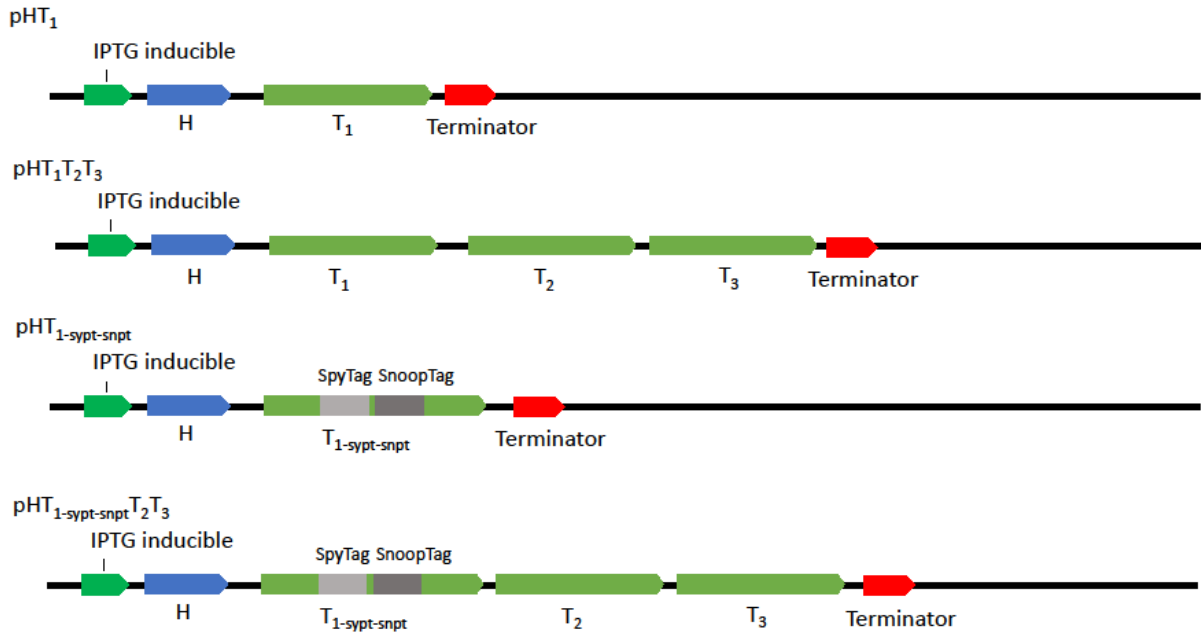

Figure S1: Schematics of synthetic operons for the expression of wiffleballs. No adapter domains minimal wiffleball: pHT<sub>1</sub>; full wiffleball: pHT<sub>1</sub>T<sub>2</sub>T<sub>3</sub>; and the SpyTag and SnoopTag adapter domain carrying variants: pHT<sub>1-sypt-snpt</sub> and pHT<sub>1-sypt-snpt</sub>T<sub>2</sub>T<sub>3</sub>. All plasmids carry the *colE1* origin of replication and an ampicillin resistance.

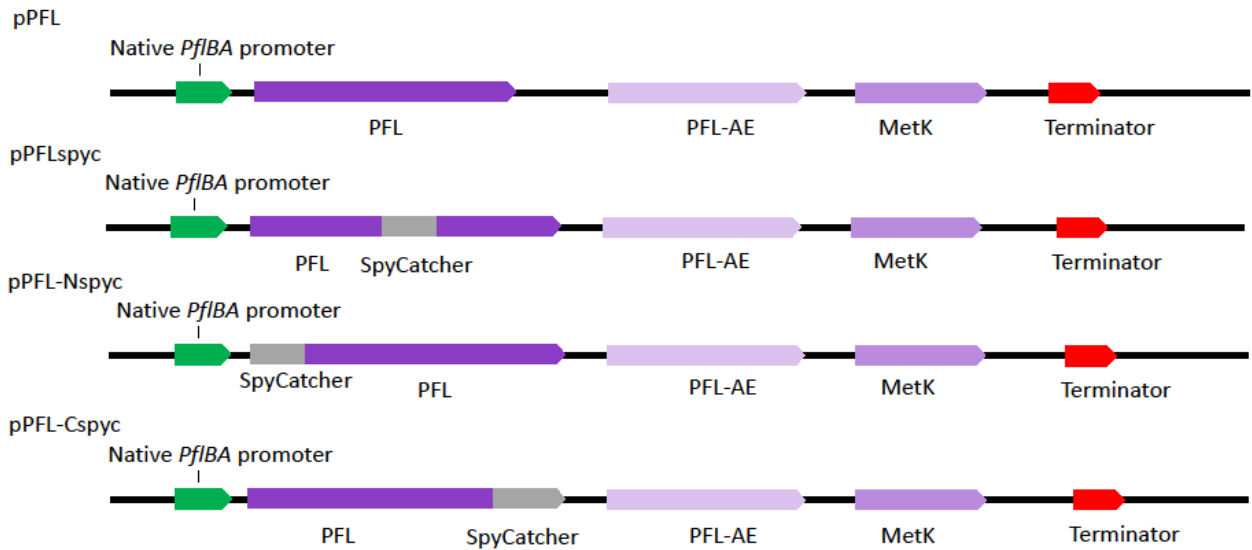

Figure S2: Schematics of synthetic operons for the expression of PFL and its variants carrying the adapter domain SpyCatcher, PFL-AE, and MetK. All constructs contain the *p15a* origin of replication and a chloramphenicol resistance.

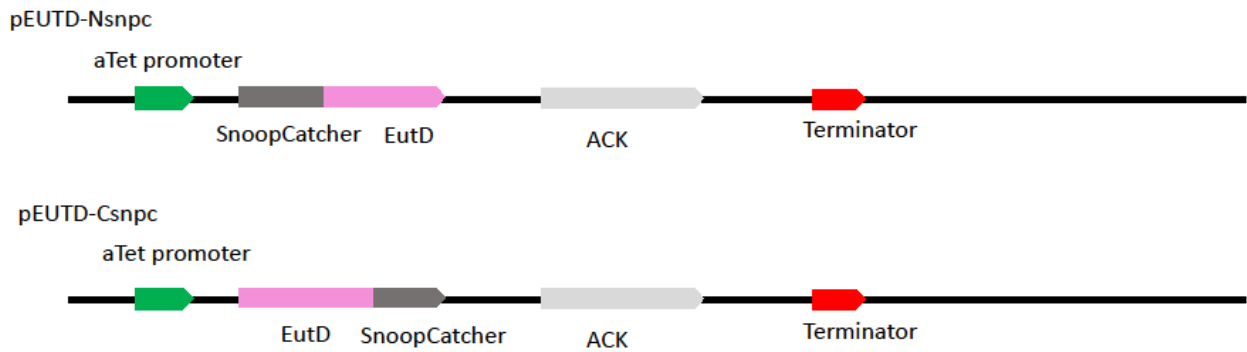

Figure S3: Schematics of synthetic operons for the expression of EUTD variants carrying the adapter domain SnoopCatcher and the acetate kinase (ACK). All constructs contain the p15a origin of replication and a kanamycin resistance.

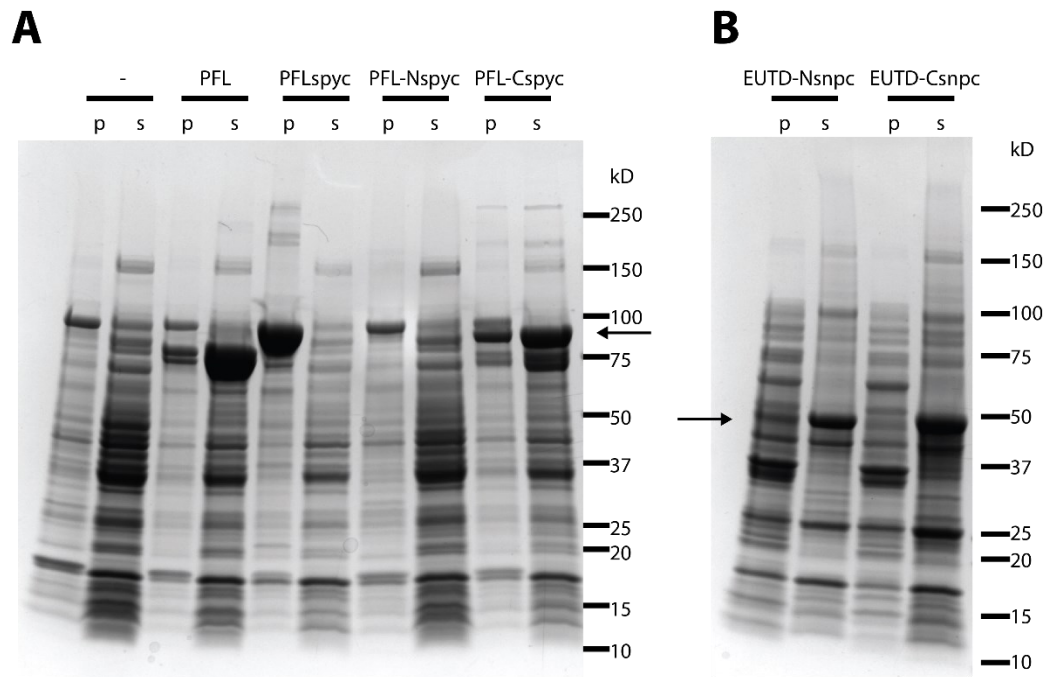

**Supp Figure S4:** Coomassie stained SDS-PAGE gels of lysates from *E. coli* expressing the cargo plasmids. (A) Expression of PFL cargo plasmids in a PFL deletion strain ( $\Delta aceA \Delta pflB$ ). -: PFL deletion; PFL: WT PFL (85 kD) expressed from a plasmid; PFLspyc: PFL with SpyCatcher insertion into a loop of the PFL (95 kD); PFL-Nspyc: N-terminal fusion of SpyCatcher (95 kD); PFL-Cspyc: C-terminal fusion of SpyCatcher (95 kD).

(B) Expression of EutD cargo plasmids. EutD-Nsnpc: N-terminal SnoopCatcher (49 kD); EutD-Csnpc: C-Terminal SnoopTag (49 kD).

# Plasmid Sequences

pHT<sub>1</sub>

BMC-H highlighted in blue; BMC-T<sub>1</sub> highlighted in green.

gacgtcgggtgcctaataagtagtgcgtaacttacattaattgcgttgccgctcactgcccgtttccagtcgggaaaacctgctgcccagctgcattaatgaa  
tcggccaacgcgcggggagaggcggtttgcgtattggcgccagggtggttttctttcaccagtgagacgggcaacagctgattgcccttcaccgcc  
tggccctgagagagttgagcaagcggtccacgctggtttccccagcaggcgaaaatcctgttgatgggtggttaacggccgggataataacatgagct  
gtcttcgggtatcgtatcccactaccgagatgtccgcaccaacgcgcagcccggactcggtaatggcgcgattgcgccagcgcctatctgatcgtt  
ggcaaccagcatcgcagtggaacgatgccctcattcagcatttgcgtggtttgtgaaaaccggacatggcactccagtcgcttcccgttccgctatc  
ggctgaatttgattgcgagtgagatattatgccagccagccagacgcagacgcgcgagacagaacttaatgggcccgctaacagcgcgatttgcg  
gtgaccaatgcgaccagatgctccacgccagtcgctaccgtcttcatgggagaaaataactggtgatgggtgctggtcagagacatcaagaa  
ataacgccggaacattagtcagggcagcttccacagcaatggcatcctggtcatccagcggatagttaatgatcagcccactgcgcttgcgcgaga  
agattgtgaccgccgctttacaggcttcgacgcgcttctaccatcgacaccaccagctggcaccagttgatcggcgcgagatttaacgcc  
gcgacaatttgcgacggcgcgtgagggccagactggaggtggcaacgcaatcagcaacgactggttccccccagttgttgcaccgcggttggg  
aatgtaattcagctccgcatcgcgcttccacttttcccgcgttttcagaaaactggctggcctggttaccacgcgggaaacggctgataagag  
acaccggcactactctgcgacatcgtataactgtactggtttcacattcaccacctgaattgactcttccgggcgctatcatgccataaccgcaaagg  
ttttgcgccattcagtggtgctcgggactctgcgactctcccttatcgactcctcattaggaagcagcccagtagtaggttagggccttgagcaccg  
ccgcccgaaggaatggtgatgcaaggagatggcgccaacagtcccccggccacggggcctgccaccatacccacgccgaaacaagcgtcatga  
gcccgaagtggcgagcccagatcttccccatcggtgatgtcggcgaatagggcggcaacccgacactgtggcggcgtgatgccggccacgatgcgt  
ccggcgtagaggatcgagaattgtgagcggataacaattgacattgtgagcggataacaagatactgagcacatcagcaggacgcactgaccgaat  
tcaaaagatctttaaagaaggagatatacatATGGCGGACGCACTGGGTATGATTGAAGTTCGTGGTTTTGTTGGTATGGTG  
GAAGCGGCGGATGCTATGGTGAAAGCGGCTAAAGTTGAACTGATTGGTTATGAAAAAACC GGCGGTGGCTACGT  
GACGGCAGTGGTTCGTGGTATGTCGACGAGTTAAGGCAGCTACCGAAGCCGTCAGCGTGCAGCAGAACGTG  
TTGGTGAAGTCGTGGCAGTTCATGTCATCCCGCTCCGCACGTGAACGTTGATGCAGCTCTGCCGCTGGGTCTGATC  
GCCGGTATGGACAAAAGCGCGTAAtttagagattaagaggagaaatactagATGGACCACGCTCCGGAACGCTTGTATG  
CGACCCCGCCGGCAGGTGAACCGGACCCCGGCACTGGGTGTGCTGGAACCTGACCTCAATTGCTCGTGGTATCA  
CCGTTGCGGATGCGGCCCTGAAACGTGCACCCGAGTCTGCTGCTGATGTCCCGCCCGTTCAGCTCTGGCAAGCATCT  
GCTGATGATGCGTGGCCAGGTGGCAGAAGTTGAAGAATCAATGATTGCAGCTCGCGAAATCGCTGGTgtaggtTCG  
ggtgctCTGCTGGATGAACTGGAACCTGCCGTATGCGCACGAACAACCTGTGGCGCTTTCTGGACGCACCCGGTGGTTGC  
AGATGCATGGGAAGAAGACACCGAAAGCGTCATTATCGTGGAAACCGCGACGGTGTGCGCGCCATTGATAGTG  
CCGACGCAGCTCTGAAAACGGCACCCGGTCTGCTGCTGATATGCGCCTGGCCATTGGTATCGCTGGCAAGGCGT  
TTTTACCCTGACGGGTGAACTGGCAGACGTGGAAGCGGCCGAGAAGTTGTCCGTGAACGTTGCGGTGCACGTC  
TGCTGGAACCTGGCATGTATCGCACGCCGTTGATGAACTGCGTGCCGCCTGTTTTCGGTGGCTCTGGTGGAC  
ATCATCACCATCACCCTAAggatccaaactcagtaaggatctccaggcatcaataaaaacgaaaggctcagtcgaaagactgggcctttc  
gtttatctgttgttgcggtgaacgctctactagagtcacactggctcaccttcgggtgggcctttctgctttatacctagggcgttcggctcggc  
gagcggatcagctcactcaaaaggcggtataacggtatccacagaatcaggggataacgcaggaagaacatgtgagcaaaaggccagcaaaag  
gccaggaaccgtaaaaaggccggttgcggttttccataggtccgccccctgacgagcatcaaaaaatcgacgctcaagtcagaggtggc  
gaaaccgacaggactataaagataaccaggcgtttccccctggaagctccctcgtcgcctctcgttccgacctgcccgttaccggatacctgtccg  
cctttctccctcgggaagcgtggcgttctcatagctcacgctgtaggtatctcagttcgggtgtaggtcgttcgctccaagctgggctgtgtgcagaa  
cccccttaccgcccaccgctgcgcttaccggtaactatcgtctttagtccaaccggtaagacacgacttatcgccactggcagcagccactggt  
aacaggattagcagagcaggtatgtaggcggtgtacagagttcttgaagtgggtggcctaactacggctacactagaaggacagatttggatctg  
cgctctgtagcagcgttaccttcggaaaaagagttggtagctcttgatccggcaacaaccaccgctggtagcgggtggttttttggttgcaagcag

cagattacgcgcagaaaaaaggatctcaagaagatcctttgatctttctacgggctgacgctcagtggaacgaaaaactcacgtaagggattt  
ggtcatgactagtgttgatttccaccaataaaaaacgccggcggaaccgagcgttctgaacaaatccagatggagttctgaggtcattactgga  
tctatcaacaggaggtccaagcagctcgtaaacttggctgacagttaccaatgcttaacagtgaggcacctatctcagcagatctctatcttctc  
ccatagttgcctgactccccgtgtagataactacgatacgggagggcctaccatctggccccagtgctgcaatgataccgcgagaccacgctcac  
cggctccagattatcagcaataaacagccagccggaagggcggagcgcagaagtggtcctgcaactttatccgctccatccagctctattaattgtt  
gccgggaagctagagtaagtagttccagttaatagtttgcgcaacgttggccattgctacagggcatcgtgggtcacgctcgtcttgggatggc  
ttcattcagctccggttccaacgatcaaggcagttacatgacccccatgttgcaaaaaagcggttagctcctcggctccgatcgttgcaga  
agtaagttggccagtgattactcatggtatggcagcactgcataattcttactgctatgccatccgtaagatgcttttctgtgactggtgagta  
tcaaccaagtattctgagaatagtgatgctggcgaccgagttgctcttggccggcgaataacgggataataccgcgccacatagcagaactttaa  
agtgtcatcattgaaaacgttcttggggcgaaaactctcaaggatctaccgctgttgagatccagttcagatgaaccactcgtgcaccaactg  
atcttcagcatctttacttaccagcgttctgggtgagcaaaaacaggaaggcaaaatgccgaaaaaagggaataagggcgacacggaaatgt  
tgaatactcactcttcttttcaatatttgaagcatttatcagggttattgtctcatgagcggatacatatttgaatgtatttagaaaaataaaca  
ataggggttccgcgcacattccccgaaaagtgccacct

pHT<sub>1</sub>T<sub>2</sub>T<sub>3</sub>

BMC-H highlighted in blue; BMC-T<sub>1</sub> highlighted in green; BMC-T<sub>2</sub> highlighted in dark green; BMC-T<sub>3</sub> highlighted in brown.

gacgtcgggtcctaagagtgagtaacttacattaattgctgtgctcactgcccgttccagtcgggaaacctgctgtccagctgcattaatgaa  
tcggccaacgcgcggggagaggcggttgcgtattggcgccaggggtggttttctttcaccagtgagacgggcaacagctgattgcccttaccgcc  
tggccctgagagagttgagcaagcgtccacgctggttggccccagcaggcgaatcctgttgatggtggttaaccggggatataacatgagct  
gtcttcggtatcgtgatccactaccgagatgtccgaccaacgcgcagcccggactcggtaatggcgcgattgcgccagcgcctatctgatcgtt  
ggcaaccagcatcgcagtggaacgatgcctcattcagcattgcatggttggtaaaaccggacatggcactccagtcgccttcccgttccgctatc  
ggctgaattgattgcgagtgagatattatgccagccagccagacgcagcgcgagacagaacttaatgggcccgttaacagcgcgatttgcg  
gtgaccaatgcgaccagatgctccaccccagtcgctaccgtcttcatggggagaaaataactggtgatgggtgctggtcagagacatcaagaa  
ataacgccggaacattagtcaggcagcttccacagcaatggcatcctggtcatccagcggatagtaatgatcagcccactgacgcttgccgcgaga  
agattgtcaccgcccgtttacaggcttcgacgcccgttcttaccatcgacaccaccaagctggcaccagttgatggcgcgagatttaacgcc  
gcgacaatttgcgacggcgcgtgcagggccagactggaggtggcaacccaatcagaacgactggttcccgcagttggtgaccagcgggtggg  
aatgtaattcagctccgcatccgcttccacttttcccgcgttttcgagaaactggctggcctggttaccacgcgggaaacggctgataagag  
acaccggcactctgcgacatcgtataactgtactggttccacattcaccacctgaattgactcttccgggcgctatcatgccataaccggaagg  
tttgcgcattcagtggtgtccgggatctcgacgcttcccttatcgactcctgattaggaagcagcccagtagtaggttagggcgttgagcaccg  
ccgccgaaggaatggtgcatgcaaggagatggcgccaacagtcccccggccagggcctgccaccatacccacgccgaaacaagcgtcatga  
gcccgaagtggcgagcccagatctccccatcggtagtgcggcatataggcgccagcaaccgcacctgtggcggcggtagtccggccacgatcgt  
ccggcgtagaggatcgagaattgtgagcggataacaattgacattgtgagcggataacaagatactgagcacatcagcaggacgactgaccgaat  
tcaaaagatctttaagaaggagatatacatATGGCGGACGCACTGGGTATGATTGAAGTTCGTGGTTTTGTTGGTATGGTG  
GAAGCGCGGATGCTATGGTGAAAGCGGCTAAAGTTGAACTGATTGGTTATGAAAAAACC GGCGGTGGCTACGT  
GACGGCAGTGGTTCGTGGTATGTCGACGAGTTAAGGCAGCTACCGAAGCCGGTCAGCGTGCAGCAGAACGTG  
TTGGTGAAGTCGTGGCAGTTCATGTCATCCGCGTCCGCACGTGAACGTTGATGCAGCTCTGCCGCTGGGTGCTAC  
GCCGGTATGGACAAAAGCGCTAAtttagagattaaagaggagaaataactagATGGACCACGCTCCGGAACGCTTTGATG  
CGACCCCGCCGGCAGGTGAACCGGACCCCGGCACTGGGTGTGCTGGAACCTGACCTCAATTGCTCGTGGTATCA  
CCGTTGCGGATGCGGCCCTGAAACGTGCACCGAGTCTGCTGCTGATGTCCGCCC GGTCAGCTCTGGCAAGCATCT  
GCTGATGATGCGTGGCCAGGTGGCAGAAGTTGAAGAATCAATGATTGCAGCTCGCGAAATCGCTGGTgaggtTCG  
ggtgctCTGCTGGATGAACTGGAACCGGTATGCGCACGAACAACCTGTGGCGCTTTCTGGACGCACCGGTGGTTGC

AGATGCATGGGAAGAAGACACCGAAAGCGTCATTATCGTGAAACCGCGACGGTGTGCGCGCCATTGATAGTG  
CCGACGCAGCTCTGAAAACGGCACCGGTCGTGCTGCGTGATATGCGCCTGGCCATTGGTATCGCTGGCAAGCGT  
TTTTACCCTGACGGGTGAAGTGGCAGACGTGGAAGCGCCGAGAAAGTTGTCCGTGAACGTTGCGGTGCACGTC  
TGCTGGAAGTGGCATGTATCGCACGCCGTTGATGAAGTGCCTGGCCGCTGTTTTTCGGTGGCTCTGGTGGAC  
ATCATCACCATCACCATAAAttagagattaagaggagaaatactagATGGAAGTGCCTGCTTATACGGTCTGGATGCC  
TGACGCCGCAACTGGTCGCCTTCTGCAACGGTGTCAACGGGTTTCATGCCGATGGAACAGCAAGCGAGCGTTC  
TGGTCGAAATTGCACCGGATCGCTGTCAACCAGCTGACCGACGCAGCACTGAAAGCAACCGCTTGCAGCCGG  
GTCTGCAAATTGTGGAACGTGCGTATGGCCTGATCGAAATGCATGATGACGATCAGGGTCAAGTTCGTGCAGCTG  
GTGACGCAATGCTGGCACACCTGGGTGCACGTGAAGCTGATCGTCTGGCACCGCGTGTGGTTAGCTCTCAGATTA  
TCACCGGTATTGACGGCCATCAGAGTCAACTGATCAACCGTATGCGCCACGGTGTATGATTCAGGCAGGCCAAA  
CGCTGTATATCTGGAAGTTCATCCGGCAGGTTACGCAGCACTGGCAGCTAATGAAGCCGAAAAAGCGGCCCGA  
TTAAGCTGCTGGAAGTCGTGACCTTGGTGCATTGGTCTGTGGCTGGGTGGTGGTGAAGCAGAAATCGCAG  
AAGCAGCTCGTGGCCAGAAGGTGCACTGGCTGGTCTGTCCGGCCGTGATAATCGCGGCTAAAttagagattaagag  
gagaaatactagATGTCAATCACCTGCGCACCTATATCTTCTGGACGCCCTGCAACCGCAACTGGCAACCTTCATCG  
GCAAAACGGCTCGTGGCTTCTGCCGGTCCCGGGTCAAGCCTGTGGGTGGAATGCTCCGGGTATTGCGA  
TCAACCGTGTGACCGATGCGGCCCTGAAAGCTACGAAGGTGCAGCCGGCGGTTCAAGTGGTTGAACGCGCGTAT  
GGCCTGCTGGAAGTTCATCACTTCGATCAGGGCGAAGTCTGGCAGCTGGTAGTACCATCTGGACAACTGGAA  
GTTCTGTGAAGAAGTTCGCTGAAGCCGAGGTGATGACCCATCAAATTATCCGTGCTGTTGAAGCGTATCAGACG  
CAAATTATCAACCGCAATAGTCAGGGCATGATGATTCTGCCGGTGAATCCCTGTTTATCTGGAAACCCAACCG  
CAGGTTACGCAGTCTGGCAGCCAATGAAGCCGAAAAAGCAGCTAACGTTACCTGGTCAATGTGACGCCGTATG  
GCGCATTCCGTCTGTACCTGGCCGGCTCAGAAGCAGAAATTGATGCGGCCGAGAAGCTGCGGAAGCCGCA  
ATCCGCAGCGTTTCTGGTGTGCGCAGGAATCGTTTCGTGACCGCTAAAggatccaaactcagtaaggatctcaggcatcaa  
taaacgaaaggctcagtcgaaagactgggctttctgtttatctgtttgtcggtaacgctctactagagtcacactggctcacttcgggtggg  
cctttctgctttatacctaggcgttcggctcggcgagcggatcagctcactcaaaggcgtaatacggttatccacagaatcaggggataacgca  
ggaaagaacatgtgagcaaaaggccagcaaaaggccaggaaccgtaaaaggccggtgtggtgcttttccataggtccgccccctgacgag  
catcaaaaaatcagcgtcaagtcagaggtggcgaaccgacaggactataaagataaccaggcgtttcccctggaagctccctctgctcctcc  
tgttccgacctcggcttaccggatacctgtccgcttttcccttcgggaagcgtggcgctttctcatagctcacgctgtaggtatctcagttcgggtga  
ggtcgttccgtccaagctgggctgtgtgcacgaacccccgttcagcccagcctgtcgccttatccggttaactatcgtcttgagccaaccggtaag  
acacgacttatgccactggcagcagcactggtaacaggattagcagagcaggtatgtaggcggtgctacagagttctgaagtggtggcctaact  
acggctacactagaaggacagtatttggtatctgcctctgctgaagccagttacctcggaaaaagagttggtagctcttgatccggcaaaaaacc  
accgctggtagcgggtggtttttgttgcaagcagcagattacgcgcagaaaaaaggatctcaagaagatcctttgatctttctacggggtctgacg  
ctcagtggaacgaaaactcagtttaagggttttggatgactagtgcttgattctcaccataaaaaacgcccggcggaaccgagcgttctgaa  
caaatccagatggagttctgaggtcattactggatctatcaacaggagtcgaagcagctcgtaaacttggtctgacagttaccaatgcttaacagtg  
aggcacctatctcagcagatctgtctatttctgtcatccatagttgctgactccccgtgtagataactacgatacgggagggcttaccatctggccc  
agtgtgcaatgataccgagaccacgctcaccggctccagattatcagcaataaaccagccagccggaaggcgagcagagaagtggtcctg  
caacttatccgctccatccagcttattaattgttccgggaagctagagtaagtagttcggcagttatagttgcaacgttgttgcattgtctaca  
ggcatcgtggtgtcacgctcgtctgttggatggcttattcagctcggttcccaacgatcaaggcaggttacatgatccccatggtgtgcaaaaaag  
cggtagctccttcggtctccgatcgttgcagaagtaagttggcgcaggttatcactcatggttatggcagcactgcataattctctactgtcatgc  
catccgtaagatgctttctgtgactggtgagtactcaaccaagtcattctgagaatagtgtagcggcgaccgagttgctcttcccggcgctcaatag  
ggataataccgcccacatagcagaacttaaaagtgctcatcattggaaaacgttcttcggggcgaaaactctcaaggatcttaccgctgttgagatc  
cagttcagatgaaccactcgtgcaccaactgatctcagcatctttactttaccagcgtttctgggtgagcaaaaacaggaaggcaaaaatgccgc  
aaaaaagggaataagggcgacaggaatgttgaatactcactcttctttcaatattattgaagcatttatcagggttattgtctcatgagcggga  
tacaatattgaatgtattgaaaaataaacaatagggttccgcgcacattccccgaaaagtgccacct

pHT<sub>1-spyt-snpt</sub>

BMC-H highlighted in blue; BMC-T<sub>1-spyt-snpt</sub> highlighted in green.

gacgtcgggtcctaataatgagtgagctaactacattaattgctgtgctcactgcccgtttccagtcgggaaacctgtcgtgccagctgcattaatgaa  
tcggccaacgcgcgggagaggcggtttcggtattggcgccagggtggtttttctttcaccagtgagacgggcaacagctgattgcccttaccgcc  
tggcctgagagagttgagcaagcggccacgctggtttgcccagcaggcgaaaatcctgttgatggtggttaacggcgggatataacatgagct  
gtcttcggtatcgtcgtatcccactaccgagatgtccgcaccaacgcgcagcccggactcggtaatggcgcgattgcgccagcgcctatgatcgtt  
ggcaaccagcatcgcagtggaacgatgcctcattcagcatttgcaggtttgtgaaaaccggacatggcactccagtcgcttcccgttccgctac  
ggctgaatttgattgcgagtgagatattatgccagccagccagacgcagacgcgagacagaactaatgggcccgtacaacgcgatttgctg  
gtgaccaatgcgaccagatgctccaccccagtcgctaccgtcttcatgggagaaaataactgttgatgggtgctggtcagagacatcaagaa  
ataacgccggaacattagtcagggcagcttccacagcaatggcatcctggtcatccagcggatagtaatgatcagcccactgacgcgttgcgcgaga  
agattgtgaccgccgcttaccagccttcgacgcgcttctaccatcgacaccaccagctggcaccagttgatggcgcgagatttaacgcc  
gacacaatttgcagcggcgcgtgagggccagactggaggtggcaacccaatcagcaacgactgtttgcccgcagttgttgccacgcggtggg  
aatgtaattcagctccgcatcgccgttccacttttcccgcgttttcgagaaacgtggctggcctggttaccacgcgggaaacggtctgataagag  
acaccggcactactctgcacatcgtataacgttactggtttcacattcaccacctgaattgactcttccgggcgctatcatgccataaccgcaaagg  
ttttgcgccattcagtggtgctcgggatctcagcgtctcccttatgcgactcctgattaggaagcagcccagtagtaggttagggcgttagcaccg  
ccgccgaaggaatggtgatgcaaggagatggcgccaacagctccccggccacggggcctgccaccatacccacgccgaaacaagcgtcatga  
gcccgaagtggcgagcccgatcttcccacggtgatgtcggcgatataggcgcgcaaccgcacctgtggcgccggtgatgcccggccacgatgcgt  
ccggcgtagaggatcgagaattgtgagcggataacaattgacattgtgagcggataacaagatactgagcacatcagcaggacgcactgaccgaat  
tcaaaagatcttttaagaaggagatatacatATGGCGGACGCACTGGGTATGATTGAAGTTCGTGGTTTTGTTGGTATGGTG  
GAAGCGCGGATGCTATGGTGAAAGCGGCTAAAGTTGAACTGATTGGTTATGAAAAACCGGCGGTGGCTACGT  
GACGGCAGTGGTTCGTGGTATGTCGACGAGTTAAGGCAGCTACCGAAGCCGGTCAGCGTGCAGCAGAACGTG  
TTGGTGAAGTCGTGGCAGTTCATGTCATCCCGCTCCGCACGTGAACGTTGATGCAGCTCTGCCGCTGGGTCTGAC  
GCCGGTATGGACAAAAGCGCGTAAtttagagattaaagaggagaaatactagATGGACCACGCTCCGGAACGCTTTGATG  
CGACCCCGCCGGCAGGTGAACCGGACCGCCCGCACTGGGTGTGCTGGAACCTGACCTCAATTGCTCGTGGTATCA  
CCGTTGCGGATGCGGCCCTGAAACGTGCACCGAGTCTGCTGCTGATGTCGCGCCGGTCAGCTCTGGCAAGCATCT  
GCTGATGATGCGTGGCCAGGTGGCAGAAGTTGAAGAATCAATGATTGCAGCTCGCGAAATCGCTGGTgaggtTCG  
ggtgctCTGCTGGATGAACTGAACTGCCGTATGCGCACGAACAACCTGTGGCGCTTTCTGGACGCACCGGTGGTTGC  
AGATGCATGGGAAGAAGACACCGAAAGCGTCATTATCGTGAAACCGCGACGGTGTGCGCGGCCATTGATAGTG  
CCGACGCAGCTCTGAAAACGGCACCGGTCGTGCTGCGTGATATGCGCCTGGCCATTGGTATCGCTGGCAAGCGCT  
TTTTACCCTGACGGGTGAACTGGCAGACGTGGAAGCGGCCGAGAAGTTGTCCGTGAACGTTGCGGTGCACGTC  
TGCTGGAACCTGGCATGTATCGCACGCCGTTGATGAACTGCGTGGCCGCCTGTTTTCCGTGGCTCTGGTGGAC  
ATCATCACCATCACCATAAaggatcaaactcgagtaaggatctccaggcatcaaataaacgaaaggctcagtcgaaagactgggcctttc  
gtttatctgttgttgcggtgaacgctctactagagtcacactggctcacctcgggtggccttctcgtttatacctagggcgttcggctcggc  
gagcggatcagctcactcaaaggcggtaatacggttatccacagaatcaggggataacgcaggaagaacatgtgagcaaaaggccagcaaaag  
gccaggaaccgtaaaaaggccggttgcggttttccataggtcgcggccctgacgagcatcaaaaaatcgacgctcaagtacaggtggc  
gaaacccgacaggactataaagataaccaggcgtttcccctggaagctccctcgtgcgctctcgtttccgaccctgcccttaccggatacctgtccg  
cctttccctcgggaagcgtggcgttttctatagctcacgctgtaggtatctcagttcgggtgtaggtcgttcgctccaagctgggctgtgtgcagaa  
cccccggtcagcccaccgctgcgcttaccgtaactatcgtcttagtccaaccggtaagacacgacttatgccactggcagcagccactggt  
aacaggattagcagagcaggtatgtaggcggtgctacagagttctgaagtggctgctaactacggctacactagaaggacagatttggatctg  
cgctctgctgaagccagttacctcggaaaaagagttgtagctcttgcgcaaaaccaccgctggtagcgggtggtttttgttcaagcag  
cagattacgcgcagaaaaaaggatctcaagaagatccttgcgttttctacgggctgacgctcagtggaacgaaactcagtttaagggtttt  
ggtcatgactagtgcttgattctaccaataaaaaacggcgccgaaccgagcgttctgaacaaatccagatggagttctgaggtcattactgga  
tctatcaacaggagtcgaagcagctgtaacttggctgacagttaccaatgcttaacagtgaggcacctatctcagcagctctcttcttctcat

ccatagttgcctgactccccgtcgtgtagataactacgatacgggagggcttaccatctggccccagtgctgcaatgataccgcgagacccacgctcac  
cggctccagattatcagcaataaaccagccagccggaagggccgagcgcagaagtggtcctgcaacttatccgcctccatccagtctattaattggt  
gccgggaagctagagtaagtagttccagttaatagtttgcgcaacgttggccattgctacaggcatcgtgggtgcacgctcgtcgtttggtatggc  
ttcattcagctccggttcccaacgatcaaggcgagttacatgatccccatggttgcaaaaaagcggtagctccttcggtcctccgatcgttgctaga  
agtaagttggccgagtgattactcatggttatggcagcactgcataattcttactgtcatccatccgtaagatgcttttctgtgactggtgagtac  
tcaaccaagtattctgagaatagtgatgaggcgaccgagttgctcctgcccggcgtcaatacgggataataaccgcgccacatagcagaactttaaa  
agtgtcatcattggaaaacgttcttcggggcgaaaactctcaaggatcttaccgctgttgagatccagttcgtatgtaacccactcgtgcaccaactg  
atcttcagcatctttactttaccagcgtttctgggtgagcaaaaacaggaaggcaaaatccgcaaaaagggaataagggcgacacggaaatgt  
tgaatactcactcttctttcaatattattgaagcatttatcagggttattgtctcatgagcggatacatatttgaatgatttagaaaaataaaca  
ataggggttccgcgacatttccccgaaaagtgccacct

pHT<sub>1-spyt-snpt</sub> T<sub>2</sub>T<sub>3</sub>

BMC-H highlighted in blue; BMC-T<sub>1-spyt-snpt</sub> highlighted in green; BMC-T<sub>2</sub> highlighted in dark green; BMC-T<sub>3</sub> highlighted in brown.

gacgtcggtcctaataagtgagtaacttacattaattgcgttgccctactgcccgtttccagtcgggaaaacctgctgcccagctgcattaatgaa  
tcggccaacgcgccccgagaggcggttgcgtattggcgccaggggtggttttctttaccagtgagacgggcaacagctgattgcccttaccgccc  
tggcctgagagagttgagcaacgggtccacgctggtttccccagcaggcgaaaatcctggtgatgggtggttaacggcgggatataacatgagct  
gtcttcggtatcgtgatccactaccgagatgtccgcaccaacgcgcagcccggactcggtaatggcgcgattgcgccagcgcctatgatcgtt  
ggcaaccagcatcgcagtggaacgatgccctcattcagcatttgcaggtttgtaaaacggacatggcactccagtcgcttcccgttccgctatc  
ggctgaatttgattgcgagtgagatattatgccagccagccagacgcagacgcgagacagaacttaattgggcccgcctaacagcgcgatttgcg  
gtgaccaatgcgaccagatgctccaccccagtcgctaccgtcttcatgggagaaaataaactggtgatgggtgctggtcagagacatcaagaa  
ataacgccggaacattagtcagggcagcttccacagcaatggcatcctggtcatccagcggatagttatgatcagcccactgacgcttgccgagaga  
agattgtcaccgcccgtttacaggcttcgacgcccgttctaccatcgacaccaccagctggcaccagttgatcggcgcgagatttaacgcc  
gcgacaatttgcgacggcggtgagggccagactggaggtggcaacccaatcagcaacgactggttcccgcaggttggccagcgggtggg  
aatgtaattcagctccgcatcgcgcttccacttttcccgcgttttcgagaaaactggctggcctggttaccacgcgggaaacggctgataagag  
acaccggcactactctgcgacatcgtataacgttactggtttcattaccacccgtaattgactcttccggcgctatcatgccataaccggaagg  
tttgcgccattcaggtgtcgggatctcagcgtctcccttatcgcactcctcattaggaagcagcccagtagtaggttagggcgttgagaccg  
ccgccgaaggaatgggtgatgcaaggagatggcgccaacagtccccggccacggggcctgccaccatacccacgccgaaacaagcgtcatga  
gcccgaagtggcgagcccgatcttcccacggtgatgtcggcgatagggcgccaacgcacctgtggcgccggtgatcgggccacgatgcgt  
ccggcgtagaggatcgagaattgtgagcggataacaattgacattgtgagcggataacaagatactgagcacatcagcaggacgcactgaccgaat  
tcaaaagatctttaagaaggagatatacatATGGCGGACGCACTGGGTATGATTGAAGTTCGTGGTTTTGTTGGTATGGTG  
GAAGCGGCGGATGCTATGGTGAAAGCGGCTAAAGTTGAACTGATTGGTTATGAAAAAACCGGCGGTGGCTACGT  
GACGGCAGTGGTTCGTGGTATGTCGACGAGTTAAGGCAGCTACCGAAGCCGGTCAGCGTGCAGCAGAACGTG  
TTGGTGAAGTCGTGGCAGTTCATGTCATCCCGCGTCCGCACGTGAACGTTGATGCAGCTCTGCCGCTGGGTCTGATC  
GCCGGTATGGACAAAAGCGCGTAAtttagagattaagaggagaaatactagATGGACCACGCTCCGGAACGCTTGGATG  
CGACCCCGCCGGCAGGTGAACCGGACCGCCCGGCACTGGGTGTGCTGGAACGACTCAATTGCTCGTGGTATCA  
CCGTTGCGGATGCGGCCCTGAAACGTGCACCGAGTCTGCTGCTGATGTCCGCCCCGGTCAGCTCTGGCAAGCATCT  
GCTGATGATGCGTGGCCAGGTGGCAGAAGTTGAAGAATCAATGATTGCAGCTCGCGAAATCGCTGGTGCAGGTcc  
gaagccgaaacccaaacctaagcctaagGGTGCTCATATTGTCATGGTTGATGCTTAAAGCCAACTAAGGGTcctaagccaaa  
gccgaaacccaaaGGTGGCTCTGGTGGAGGTGGAAGTGGTGGTAACTGGGCGATATTGAATTTATTAAGTGAACA  
AAGGAGGTAGCGGCGGTGGAGGTTAGGCGGAGGTGCTCTGCTGGATGAACTGGAACGTCGATGCGCACGA  
ACAACTGTGGCGCTTCTGGACGCACCGGTGGTTGCAGATGCATGGGAAGAAGACACCGAAAGCGTCATTATCGT



GGAAACCGCGACGGTGTGCGCGGCCATTGATAGTGCCGACGCAGCTCTGAAAACGGCACCGGTCTGTGCTGCGTG  
ATATGCGCCTGGCCATTGGTATCGCTGGCAAGGCGTTTTTACCTGACGGGTGAACTGGCAGACGTGGAAGCGG  
CCGAGAAAGTTGTCGTGAACGTTGCGGTGCACGTCTGCTGAACTGGCATGTATCGCACGCCGGTTGATGAAC  
TGCGTGGCCGCTGTTTTCGGTGGCTCTGGTGGACATCATCACCATCACCCTAAtttagagattaaagaggagaaatact  
agATGGAACCTGCGTGCTTATACGGTCTGGATGCCCTGCAGCCGCAACTGGTCGCTTTCTGCAAACGGTGTCAAC  
GGGTTTCATGCCGATGGAACAGCAAGCGAGCGTTCTGGTCGAAATTGCACCGGGTATCGCTGTCAACCAGCTGAC  
CGACGCAGCACTGAAAGCAACGCGTTGCCAGCCGGGTCTGCAAATTGTGGAACGTGCGTATGGCCTGATCGAAAT  
GCATGATGACGATCAGGGTCAAGTTCGTGCAGCTGGTGCACCAATGCTGGCACACCTGGGTGCACGTGAAGCTG  
ATCGTCTGGCACCGCGTGTGGTTAGCTCTCAGATTATCACCGGTATTGACGGCCATCAGAGTCAACTGATCAACCG  
TATGCGCCACGGTATATGATTCAGGCAGGCCAAACGCTGTATATCCTGGAAGTTCATCCGGCAGGTTACGCAGC  
ACTGGCAGCTAATGAAGCCGAAAAAGCGGCCCGATTAAAGCTGCTGGAAGTCGTGACCTTTGGTGCATTTCGGTGC  
TCTGTGGCTGGGTGGTGGTGAAGCAGAAATCGCAGAAGCAGCTCGTGCAGCAGAAGGTGCACTGGCTGGTCTGT  
CCGGCCGTGATAATCGCGGCTAAtttagagattaaagaggagaaatactagATGTCAATCACCTGCGCACCTATATCTTCT  
GGACGCCCTGCAACCGCAACTGGCAACCTTCATCGGCAAAACGGCTCGTGGCTTCTGCCGGTCCCAGGTCAGGC  
AAGCCTGTGGGTGGAATTGCTCCGGGTATTGCGATCAACCGTGTGACCGATGCGGCCCTGAAAGCTACGAAGGT  
GCAGCCGGCGGTTCAAGTGGTTGAACGCGCGTATGGCCTGCTGGAAGTTCATCACTTCGATCAGGGCGAAGTCT  
GGCAGCTGGTAGTACCATCCTGGACAAACTGGAAGTTCGTGAAGAAGGTGCCTGAAGCCGAGGTGATGACCC  
ATCAAATTATCCGTGCTGTTGAAGCGTATCAGACGCAAATTATCAACCGCAATAGTCAGGGCATGATGATTCTGCC  
GGGTGAATCCCTGTTTATCCTGGAACCCAACCGGCAGGTTACGCAGTCTGGCAGCCAATGAAGCCGAAAAAGC  
AGCTAACGTTACCTGGTCAATGTGACGCCGATGGCGCATTGGTCTGTGTACCTGGCCGGCTCAGAAGCAGA  
AATTGATGCGGCCGAGAAGCTGCGGAAGCCGCAATCCGCAGCGTTTCTGGTGTGCGCGAGGAATCGTTTCGTGA  
CCGCTAAggatccaaactcagtaaggatctccaggcatcaataaaacgaaaggctcagtcgaaagactgggccttctgtttatctgtttgt  
cggatgaacgctctactagagtcacactggctcaccttcgggtgggcttctcgtttatacctagggcgttcggctcggcgagcggtatcagctca  
ctcaaaggcgtaatacggttatccacagaatcaggggataacgaggaaagaacatgtgagcaaaaggccagcaaaaggccaggaaccgtaaa  
aaggccggtgtgctggctttttccataggtccgccccctgacgagcatcacaataatcagctcaagtcagaggtggcgaaaccgacaggact  
ataaagataccaggcgtttcccctggaagctccctcgtgctctcctgttccgacctgcccgttaccggatacctgtcgcctttctccttcgggaa  
gctggcgctttctcatagctcagctgtaggtatctcagttcgggtgtaggtcgtcctcaagtcgggtgtgtgcaacccccgttcagccga  
ccgctgctccttatccggttaactatcgtcttgagtcacaccggttaagacacgacttatcgcactggcagcagccactgtaacaggattagcagag  
cgaggtatgtaggcggtctacagagttctgaagtggtggcctaactcggctacactagaaggacagtttggatctcgtcctgtgaagccag  
ttaccttggaanaagagttgtagctcttgatccggcaaaacaaccaccgctgtagcgggtgtttttgtttgcaagcagcagattacgcgcagaa  
aaaaaggatctcaagaagatccttgatctttctacgggtctgacgctcagtggaacgaaaactcacgtaagggttttggatgactagtgctg  
gattctaccaataaaaaacgcccggcggaaccgagcgttctgaacaaatccagatggagttctgaggtcattactggatctatcaacaggagttca  
agcagactcgtaaacttggctgacagttaccaatgcttaatcagtgaggcacctatctcagcagatctgtctatttcggtcatcattgctgactcc  
ccgtcgtgtagataactacgatacgggagggttaccatctggccccagtgctcaatgataccgagagaccacgctcaccggtccagattatca  
gcaataaaccagccagccggaaggccgagcgcagaagtggtcctgcaactttatccgctccatccagttatattgttggcggaagctagagt  
aagtagttcggcagttaatagttgcaacgttggcattgctacaggcatcgtggtgtcagctcgtcgttggatggcttattcagctccggttc  
ccaacgatcaaggcagttacatgatccccatgtgtgcaaaaaagcggtagctcctcggctcctccgatcgtgtgcaagaagtaagttggccgag  
gttatcactcatggttatggcagcactgcataattcttactgtcatgccatccgtaagatgctttctgtgactggtagtactcaaccaagtcattctg  
agaatagtgatcgggcgaccgagttgctcttgccggcgtcaatacgggataataccgcccacatagcagaactttaaagtgctcatattggaa  
aacgttctcggggcgaaaactcaaggatcttaccgctgttgagatccagttcagatgaaccactcgtgcaccaactgatcttcagcatctttact  
ttaccagcgtttctgggtgagcaaaaacaggaaggcaaaatgccgcaaaaagggaataaggcgacacggaaatgtgaatactcactcttc  
cttttcaatattatgaagcattatcaggttattgtctcatgagcggatacatattgaatgtatttagaaaaataacaaatagggttccgcgac  
attccccgaaaagtgccacct

pPFL

PFL (*pflB*) highlighted in purple; PFL-AE (*pflA*) highlighted in magenta, MetK highlighted in red.

gacgtcttaagaccactttcacatttaagttgttttctaataccgcatatgatcaattcaaggccgaataagaaggctggctctgcaccttggtgatcaa  
ataattcgatagcttgcgtaataatggcggcactatcagtagtaggtgttcccttctctttagcgacttgatgctcttgatctccaatacgaac  
ctaaagtaaaatgccccacagcgtgagtgcatataatgattctctagtgaanaacctgttggcataaaaaggctaattgattttcgagagttcat  
actgttttctgtaggccgtgtacataatgtacttttctccatcgcgatgacttagtaaagcacatctaaaacttttagcgttattacgtaaaaaatctt  
gccagctttcccttctaaagggcaaaagtgagtaggtgcctatcaacatctcaatggctaaggcgtcgagcaaaagcccgtatttttcatgcca  
atacaatgtaggtgctctacacctagcttctggcgagttacgggtgttaaacctcgattccgacctcattaagcagctctaatacgctgtaataca  
ctttactttatctaactagacatcattaattcctaattttgttgacactctatcgttgatagagtattttaccactccctatcagtgatagagaaaaga  
attcaaaagatctttaagaaggagatatacatAGCATTCTGGGCAAAAATAAAATCAAATAGCCTACGCAATGTAGGCTTAAT  
GATTAGTCTGAGTTATATTACGGGGCGTTTTTAAATGCCCGCTTTACATATATTTGCATTAATAAAATAATTGTAA  
TTATAAGGTTAAATATCGGTAATTTGATTTAATAAATACGATCGATATTGTTACTTTATTCGCCTGATGCTCCCTTT  
TAATTAAGTGTAGCGGAGGATGCGGAAAAAATTCAACTCATTTGTTAATTTTTAAATTTATTTTTATTTGGATA  
ATCAAATATTTACTCCGATTTGCATAAAAACCATGCGAGTTACGGGCCTATAAGCCAGGCGAGATATGATCTATA  
TCAATTTCTCATCTATAATGCTTTGTTAGTATCTCGTCGCCGACTTAATAAAGAGAGAGTTAGTGTGAAAGCTGACA  
ACCCTTTGATCTTTACTTCTGCTGCAATGGCCAAAGTGGCCGAAGAGGCGGGTGTCTATAAAGCAACGAAACA  
TCCGCTTAAGACTTTCTATCTGGCGATTACCGCCGGTGTTCATCTCAATCGCATTCTTCTATATCACAGCAAC  
CACTGGCACAGGCACAATGCCCTTCGGCATGGCAAACTGGTTGCGGCATTTGCTTCTCTGGGGCTGATTCTT  
TGTGTTGTCTGCGGAGCCGATCTTTACTTCCACCGTGTGATTGTTGTTGCTAAGGCGAGTGGGCGCATCACCT  
GGGTCAGTTGGCGAAAACTGGCTAAATGTCTATTTGGCAACCTGGTCGGCGCACTGCTGTTGTACTTTAAT  
GTGGCTTCCGGCGAGTATGACCGCAAATGGTCAATGGGGACTAAACGTCCTACAAACCGCCGACCACAAAGT  
GCACCATACTTTATTGAGGCCGTCTGTCTTGGTATCCTGGCAAACTGATGGTATGTCTGGCAGTATGGATGAGT  
TATTCTGGCCGAGCCTGATGGACAAAGCGTTCATTATGGTGTGCCGGTCCGATGTTTGTGCCAGCGGTTTTG  
AGCACAGTATCGCAAACATGTTTATGATCCCGATGGGTATTGTAATCCGCGACTTCGCATCCCCGGAATTTGGAC  
CGCAGTCGGTTCTGCACCGAAAAATTTTCTCACCTGACCGTGATGAATTCATCACTGATAACCTGATTCCGGTTA  
CGATCGGCAACATTATCGGTGGTGGTTTGTGGTTGGGTTGACATACTGGGTCAATTTACCTGCGTGAAAACGACCA  
CCATTAATGGTTGTCGAAGTACGCAGTAAATAAAAAATCCACTTAAGAAGGTAGGTGTTACATGTCCGAGCTTAAT  
GAAAAGTTAGCCACAGCCTGGGAAGGTTTTACCAAAGGTGACTGGCAGAATGAAGTAAACGTCCGTGACTTCATT  
CAGAAAACTACACTCCGTACGAGGGTGACGAGTCTTCTGGCTGGCGCTACTGAAGCGACCACCACCTGTGG  
GACAAAGTAATGGAAGGCGTTAACTGAAAACCGCACTCACGCGCCAGTTGACTTTGACACCGCTGTTGCTTCC  
ACCATCACCTCTCACGACGCTGGCTACATCAACAAGCAGCTTGAGAAAATCGTTGGTCTGCAGACTGAAGCTCCGC  
TGAAACGTGCTCTTATCCCGTTCGGTGGTATCAAAATGATCGAAGGTTCTGCAAAGCGTACAACCGCAACTGGA  
TCCGATGATCAAAAAAATCTTCACTGAATACCGTAAAACCTACAACCAGGGCGTGTTCGACGTTTACTCCTCGGAC  
ATCCTGCGTTGCCGTAATCTGGTGTCTGACCGTCTGCCAGATGCATATGGCCGTGGCCGTATCATCGGTGACT  
ACCGTCGCGTTGCGCTGTACGGTATCGACTACCTGATGAAAGACAACTGGCACAGTTCATTCTCTGCAGGCTGA  
TCTGAAAAACGGCGTAACTGGAACAGACTATCCGTCTGCGCGAAGAAATCGCTGAACAGCACCGCGCTCTGGG  
TCAGATGAAAGAAATGGCTGCGAAATACGGCTACGACATCTCTGGTCCGGCTACCAACGCTCAGGAAGCTATCCA  
GTGGACTTACTTCGGCTACCTGGCTGCTGTTAAGTCTCAGAACGGTGTGCAATGTCCTTCGGTCTGACCTCCACT  
TCCTGGATGTGTACATCGAACGTGACCTGAAAGCTGGCAAGATCACCGAACAAGAAGCGCAGGAAATGGTTGACC  
ACCTGGTCATGAACTGCGTATGGTTCGCTTCTGCGTACTCCGGAATACGATGAACTGTTCTCTGGCGACCCGAT  
CTGGGCAACCGAATCTATCGGTGGTATGGCCTCGACGGTCTGACCTGGTTACCAAAAACAGCTTCCGTTTCTG  
AACACCCTGTACACCATGGGTCCGTCTCCGGAACCGAACATGACCATTCTGTGGTCTGAAAACTGCCGCTGAACT  
TCAAGAAATTCGCCGCTAAAGTGTCCATCGACACCTTCTCTGCAGTATGAGAACGATGACCTGATGCGTCCGGA

CTTCAACAACGATGACTACGCTATTGCTTGCTGCGTAAGCCCGATGATCGTTGGTAAACAAATGCAGTTCTTCGGT  
GCGCGTGCAAACCTGGCGAAAACCATGCTGTACGCAATCAACGGCGCGTTGACGAAAAACTGAAAATGCAGGT  
TGGTCCGAAGTCTGAACCGATCAAAGGCGATGTCCTGAACTATGATGAAGTATGGAGCGCATGGATCACTTCAT  
GGACTGGCTGGCTAAACAGTACATCACTGCACTGAACATCATCCACTACATGCACGACAAGTACAGCTACGAAGCC  
TCTCTGATGGCGCTGCACGACCGTGACGTTATCCGCACCATGGCGTGTGGTATCGCTGGTCTGTCCGTTGCTGCTG  
ACTCCCTGTCTGCAATCAAATATGCGAAAGTTAAACCGATTTCGTGACGAAGACGGTCTGGCTATCGACTTCGAAAT  
CGAAGGCGAATACCCGCAGTTTGGTAACAATGATCCGCGTGTAGATGACCTGGCTGTTGACCTGGTAGAACGTTT  
CATGAAGAAAATTCAGAACTGCACACCTACCGTGACGCTATCCCGACTCAGTCTGTTCTGACCATCACTTCTAACG  
TTGTGTATGGTAAGAAAACGGGTAACACCCAGACGGTCTGTCGTGCTGGCGCGCCGTTCCGACCCGGGTGCTAAC  
CGATGCACGGTCTGACCAGAAAGGTGCAGTAGCCTCTGACTTCCGTTGCTAAACTGCCGTTTGCTTACGCTAA  
AGATGGTATCTCCTACACCTTCTCTATCGTTCCGAACGCACTGGGTAAGACGACGAAGTTCGTAAGACCAACCTG  
GCTGGTCTGATGGATGGTACTTCCACCACGAAGCATCCATCGAAGGTGGTCAGCACCTGAACGTTAACGTGATG  
AACCGTGAAATGCTGCTCGACGCGATGGAAAACCCGAAAAATATCCGCAGCTGACCATCCGTGTATCTGGCTAC  
GCAGTACGTTTCAACTCGCTGACTAAAGAAGCAGCAGCAGGACGTTATTACTCGTACCTTCACTCAATCTATGTAATT  
AGATTTGACTGAAATCGTACAGTAAAAAGCGTACAATAAAGGCTCCACGAAAGTGGGGCCTTTTTAGCGCGAGA  
GCCTTTTTGTGAGCTATCTATACTTTAAGGTGACTGCCAAAACAGACTCGACGTAGCCTTCGAGCTGCGCACCAAC  
ACGGCCTCAGATGGGCCACATCTGGAGAAACACCGCAATGTCAGTTATTGGTCGCATTCACTCCTTTGAATCCTGT  
GGAACCGTAGACGGCCAGGTATTGCTTTATCACTTTTCCAGGGCTGCCTGATGCGCTGCCTGTATTGTCATAA  
CCGCGACACCTGGGACACGCATGGCGGTAAGAAGTTACCGTTGAAGATTTGATGAAGGAAGTGGTGACCTATC  
GCCACTTTATGAACGCTTCCGGCGCGCGGTTACCGCATCCGGCGGTGAAGCAATCTGCAAGCTGAGTTTGTCG  
TGACTGGTTCCGCGCTGCAAAAAAGAAGGCATTACATACCTGTCTGGACACCAACGTTTTGTTGCTCGTTACGAT  
CCGGTGATTGATGAACTGCTGGAAGTAACCGACCTGGTAATGCTCGATCTCAAACAGATGAACGACGAGATCCAC  
CAAAATCTGGTTGGAGTTTCAACCACCGCACGCTGGAGTTCGCTAAATATCTGGCGAACAAAAATGTGAAGGTG  
TGGATCCGCTACGTTGTTGTCCAGGCTGGTCTGACGATGACGATTACGCGCATCGCCTCGGTGAATTTACCCGTG  
ATATGGGCAACGTTGAGAAAATCGAGCTTCTCCCCTACCACGAGCTGGGCAAGCACAATGGGTGGCAATGGGT  
GAAGAGTACAACTCGACGGTGTAAACCACCGAAGAAAGAGACCATGGAACGCGTGAAAGGCATTCTTGAGCA  
GTACGGTCATAAGGTAATGTTCTAAtttagagattaaagaggagaaatactagGTGATATTAATATGGCAAAACACCTTT  
TACGTCCGAGTCCGCTCTGAAGGGCATCCTGACAAAATTGCTGACCAAATTTCTGATGCCGTTTTAGACGCGATC  
CTCGAACAGGATCCGAAAGCACGCGTTGCTTGCGAAAACCTACGTA AAAACCCGGCATGGTTTTAGTTGGCGGCGAA  
ATCACCACCAGCGCCTGGGTAGACATCGAAGAGATCACCCGTAACACCGTTCGCGAAATTGGCTATGTGCATTCCG  
ACATGGGCTTTGACGCTAACTCCTGTGCGTTCTGAGCGCTATCGGCAACAGTCTCCTGACATCAACCAGGGCGT  
TGACCGTGCCGATCCGCTGGAACAGGGCGCGGGTGACCAGGGTCTGATGTTTGGCTACGCAACTAATGAAACCG  
ACGTGCTGATGCCAGCACCTATCACCTATGCACACCGTCTGGTACAGCGTCAGGCTGAAGTGCCTAAAAACGGCA  
CTCTGCCGTGGCTGCGCCGGACGCGAAAAGCCAGGTGACTTTTTCAGTATGACGACGGCAAAATCGTTGGTATCG  
ATGCTGTCGTGCTTTCACTCAGCACTCTGAAGAGATCGACCAGAAATCGCTGCAAGAAGCGGTAATGGAAGAGA  
TCATCAAGCCAATTCTGCCCGCTGAATGGCTGACTTCTGCCACCAAATTTCTCATCAACCCGACCGGTCGTTTCGTT  
ATCGGTGGCCAATGGGTGACTGCGGTCTGACTGGTGCATAAAATTCGTTGATACCTACGGCGGCATGGCGCGT  
CACGGTGGCGGTGCATTCTCTGGTAAAGATCCATCAAAAGTGGACCGTTCGCGAGCCTACGCAGCACGTTATGTC  
GCGAAAAACATCGTTGCTGCTGGCCTGGCCGATCGTTGTGAAATTCAGGTTTCTACGCAATCGGCGTGGCTGAAC  
CGACCTCCATCATGGTAGAACTTTCCGTAAGTGAAGAAAGTGCCTTCTGAACAACCTGACCCTGCTGGTACGTGAGTT  
CTTCGACCTGCGCCATACGGTCTGATTCAGATGCTGGATCTGCTGCACCCGATCTACAAAGAAACCGCAGCATA  
GGTCACTTTGGTCGTGAACATTTCCCGTGGGAAAAACCGACAAAGCGCAGCTGCTGCGCGATGCTGCCGGTCTG  
AAGTAAATTTCCCGTAAAGCGGCAACTTTATTGAGTTGCCGTTTggatccaaactcgagtaaggatctccaggcatcaataaa  
acgaaaggctcagtcgaaagactgggcctttcgttttatctgtttgttcggtgaacgctctctactagagtcacactggctcaccttcgggtgggcctt



AGCACAGTATCGCAAACATGTTTATGATCCCGATGGGTATTGTAATCCGCGACTTCGCATCCCCGGAATTTTGAC  
CGCAGTCGGTTCTGCACCGGAAAATTTTCTCACCTGACCGTGATGAATTCATCACTGATAACCTGATTCCGGTTA  
CGATCGGCAACATTATCGGTGGTGGTTTGTGGTTGGGTTGACATACTGGGTCATTTACCTGCGTGAAAACGACCA  
CCATTAATGGTTGTCTGAAGTACGCAGTAAATAAAAAATCCACTTAAGAAGGTAGGTGTTACATGTCCGAGCTTAAT  
GAAAAGTTAGCCACAGCCTGGGAAGGTTTTACCAAAGGTGACTGGCAGAATGAAGTAAACGTCCGTGACTTCATT  
CAGAAAAACTACACTCCGTACGAGGGTGACGAGTCCTTCTGGCTGGCGCTACTGAAGCGACCACCACCTGTGG  
GACAAAGTAATGGAAGGCGTTAAACTGGAAAACCGCACTCACGCGCCAGTTGACTTTGACACCGCTGTTGCTTCC  
ACCATCACCTCTCACGACGCTGGCTACATCAACAAGCAGCTTGAGAAAATCGTTGGTCTGCAGACTGAAGTCCCG  
TGAAACGTGCTCTTATCCCGTTCGGTGGTATCAAAATGATCGAAGGTTCTGCAAAGCGTACAACCGGAACTGGA  
TCCGATGATCAAAAAAATCTTCACTGAATACCGTAAAACCTACAACCAGGGCGTGTTGACGTTTACACTCCGGAC  
ATCCTGCGTTGCCGTAAATCTGGTGTCTGACCGGTCTGCCAGATGCATATGGCCGTGGCCGTATCATCGGTGACT  
ACCGTCGCGTTGCGCTGTACGGTATCGACTACCTGATGAAAGACAAACTGGCACAGTTCACTTCTCTGCAGGCTGA  
TCTGGAAAACGGCGTAAACCTGGAACAGACTATCCGTCTGCGCGAAGAAATCGCTGAACAGCACCGCGCTCTGGG  
TCAGATGAAAGAAATGGCTGCGAAATACGGCTACGACATCTCTGGTCCGGCTACCAACGCTCAGGAAGCTATCCA  
GTGGACTTACTTCGGCTACCTGGCTGCTGTTAAGTCTCAGAACGGTGTGCAATGTCCTTCGGTCTACCTCCACT  
TCCTGGATGTGTACATCGAACGTGACCTGAAAGCTGGCAAGATCACCGAACAAGAAGCGCAGGAAATGGTTGACC  
ACCTGGTCATGAAACTGCGTATGGTTCGCTTCTGCGTACTCCGGAATACGATGAACTGTTCTCTGGCGACCCGAT  
CTGGGCAACCGAATCTATCGGTGGTATGGGCCTCGACGGTCGTACCCTGGTTACCAAAAACAGCTTCCGTTTCCTG  
AACACCCTGTACACCATGGGTCCGTCTCCGGAACCGAACATGACCATTCTGTGGTCTGAAAAACTGCCGCTGAACT  
TCAAGAAATTCGCCGCTAAAGTGTCCATCGACACCTTCTCTGCAGTATGAGAACGATGACCTGATGCGTCCGGA  
CTTCAACAACGATGACTACGCTATTGCTTGTGCGTAAGCCCGATGATCGTTGGTAAACAAATGCAGTTCCTCGGT  
GCGCGTGCAAACCTGGCGAAAACCATGCTGTACGCAATCAACGGCGGCGTTGACGAAAAACTGAAAATGCAGGT  
TGGTCCGAAGTCTGAACCGATCAAAGGCGATGTCCTGAACTATGATGAAGTGTGGAGCGCATGGATCACTTCAT  
GGACTGGCTGGCTAAACAGTACATCACTGCACTGAACATCATCCACTACATGCACGACAAGTACAGCTACGAAGCC  
TCTCTGATGGCGCTGCACGACCGTGACGTTATCCGCACCATGGCGTGTGGTATCGCTGGTCTGTCCGTTGCTGCTG  
ACTCCCTGTCTGCAATCAAATATGCGAAAGTTAAACCGATTCTGTGACGAAGGTTGAGGAGATAGTGCTACCCAT  
TAAATTCTCAAACGTGATGAGGACGGCAAAGAGTTAGCTGGTGCAACTATGGAGTTGCGTGATTTCATCTGGTAA  
AACTATTAGTACATGGATTTAGATGGACAAGTAAAGATTTCTACCTGTATCCAGGAAAATATACATTTGTCAA  
ACCGCAGCACGACGGTTATGAGGTAGCAACTGCTATTACCTTTACAGTTAATGAGCAAGGTCAGGTTACTGTAA  
ATAGTGGTAGCAGTGGTAGTTCAGGCTCTCAGGCAGCGACGGTCTGGCTATCGACTTCGAAATCGAAGGCGAAT  
ACCCGCAGTTTGGTAAACATGATCCGCGTGTAGATGACCTGGCTGTTGACCTGGTAGAACGTTTCATGAAGAAAAT  
TCAGAAACTGCACACCTACCGTGACGCTATCCCGACTCAGTCTGTTCTGACCATCACTTAAACGTTGTGTATGGTA  
AGAAAACGGGTAACACCCCAGACGGTCGTGCTGCTGGCGCGCCGTTCCGACCGGGTGCTAACCCGATGCACGGT  
CGTGACCAGAAAAGGTGCAGTAGCCTCTCTGACTTCCGTTGCTAAACTGCCGTTTGCTTACGCTAAAGATGGTATCT  
CCTACACCTTCTCTATCGTTCCGAACGCACTGGGTAAAGACGACGAAGTTCGTAAGACCAACCTGGCTGGTCTGAT  
GGATGGTACTTCCACCACGAAGCATCCATCGAAGGTGGTCAGCACCTGAACGTTAACGTGATGAACCGTGAAAT  
GCTGCTCGACGCGATGGAAAACCCGGAAAAATATCCGCAGCTGACCATCCGTGTATCTGGCTACGCAGTACGTTT  
AACTCGCTGACTAAAGAACAGCAGCAGGACGTTATTACTCGTACCTTCACTCAATCTATGTAATTAGATTTGACTGA  
AATCGTACAGTAAAAAGCGTACAATAAAGGCTCCACGAAAGTGGGGCCTTTTTTAGCGCGAGAGCCTTTTTGTCA  
GCTATCTATACTTAAAGGTGACTGCCAAAACAGACTCGACGTAGCCTTCGAGCTGCGACCAACACGGCCTCAGAT  
GGCCACATCTGGAGAAACACCGCAATGTCAGTTATTGGTCGATTCACTCCTTTGAATCCTGTGGAACCGTAGAC  
GGCCAGGTATTCGCTTATCACCTTTTTCCAGGGCTGCTGATGCGCTGCTGTATTGTCATAACCGCGACACCTG  
GGACACGCATGGCGGTAAAGAAGTTACCGTTGAAGATTTGATGAAGGAAGTGGTGACCTATCGCCACTTATGAA  
CGCTTCCGGCGGCGGCGTTACCGCATCCGGCGGTGAAGCAATCCTGCAAGCTGAGTTTGTTCGTGACTGGTCCG

CGCTGCAAAAAAGAAGGCATTACACCTGTCTGGACACCAACGGTTTTGTTTCGTGTTACGATCCGGTGATTGAT  
GAACTGCTGGAAGTAACCGACCTGGTAATGCTCGATCTCAAACAGATGAACGACGAGATCCACCAAAATCTGGTT  
GGAGTTTCCAACCACCGCACGCTGGAGTTCGCTAAATATCTGGCGAACAAAAATGTGAAGGTGTGGATCCGCTAC  
GTTGTTGTCCCAGGCTGGTCTGACGATGACGATTACGCGCATCGCCTCGGTGAATTTACCCGTGATATGGGCAACG  
TTGAGAAAATCGAGCTTCTCCCTACCACGAGCTGGGCAAGCACAAATGGGTGGCAATGGGTGAAGAGTACAAAC  
TCGACGGTGTTAAACCACCGAAGAAAGAGACCATGGAACGCGTGAAAGGCATTCTTGAGCAGTACGGTCATAAG  
GTAATGTTCTAAtttagagattaaagaggagaaatactagGTGATATTAATATGGCAAAACACCTTTTTACGTCCGAGTCCG  
TCTCTGAAGGGCATCTGACAAAATTGCTGACCAAATTTCTGATGCCGTTTTAGACGCGATCCTCGAACAGGATCC  
GAAAGCACGCGTGTCTGCGAAACCTACGTAAAAACCGGCATGGTTTTAGTTGGCGGCGAAATCACCACCAGCGC  
CTGGGTAGACATCGAAGAGATCACCCGTAACACCGTTCGCGAAATTTGGCTATGTGCATTCCGACATGGGCTTTGAC  
GCTAACTCCTGTGCGGTTCTGAGCGCTATCGGCAAACAGTCTCCTGACATCAACCAGGGCGTTGACCGTGCCGATC  
CGCTGGAACAGGGCGCGGGTGACCAGGGTCTGATGTTTGGCTACGCAACTAATGAAACCGACGTGCTGATGCCA  
GCACCTATCACCTATGCACACCGTCTGGTACAGCGTCAGGCTGAAGTGCCTAAAAACGGCACTCTGCCGTGGCTG  
CGCCCGGACGCGAAAAGCCAGGTGACTTTTCAGTATGACGACGGCAAATCGTTGGTATCGATGCTGTCGTGCTT  
TCCACTCAGCACTCTGAAGAGATCGACCAGAAATCGCTGCAAGAAGCGGTAATGGAAGAGATCATCAAGCCAATT  
CTGCCCGCTGAATGGCTGACTTCTGCCACCAAATTTCTCATCAACCCGACCGGTCGTTTCGTTATCGGTGGCCCAAT  
GGGTGACTGCGGTCTGACTGGTCGTAATAATTATCGTTGATACCTACGGCGGCATGGCGCGTCACGGTGGCGGTGC  
ATTCTCTGGTAAAGATCCATCAAAAGTGGACCGTTCGCGAGCCTACGCAGCACGTTATGTGCGGAAAAACATCGTT  
GCTGCTGGCCTGGCCGATCGTTGTGAAATTCAGGTTTCTACGCAATCGGCGTGGCTGAACCGACCTCCATCATGG  
TAGAAACTTTCCGTACTGAGAAAGTGCCTTCTGAACAACCTGACCCTGCTGGTACGTGAGTTCTTCGACCTGCGCCG  
ATACGGTCTGATTACAGATGCTGGATCTGCTGCACCCGATCTACAAAGAAACCGCAGCATAACGGTCACTTTGGTCGT  
GAACATTTCCCGTGGGAAAAAACCGACAAAGCGCAGCTGCTGCGCGATGCTGCCGGTCTGAAGTAA TTTCCCGT  
AAAGCGGCAACTTTATTGAGTTGCCGCTTTggatccaaactcgagtaaggatctccaggcatcaataaaacgaaaggctcagtcgaa  
agactgggctttctgtttatctgtttgtcgggaacgctctactagagtcacactggctcaccttcgggtgggctttctcgtttatacctagggaa  
tatattccgcttctcgtcactgactcgtactcgtcgttcgactgcgcgagcggaatggcttacgaaacggggcgagatcttctggaagatg  
ccaggaagataacttaacagggagtgagagggccgcgcaaaagccgttttccataggctccgccccctgacaagcatcacgaaatctgacgctca  
aatcagtggtggcgaaacccgacaggactataaagataccaggcgtttccccctggcggtccctcgtgctctcgttctcgttctcgtttaccg  
gtgtcattccgctgttatggccgctttgtctcattccacgctgacactcagttccgggtaggcagttcgtccaagctggactgtatgcagaaacccc  
cgttcagtcgaccgctgctccttatccggtaactatcgtcttgagccaacccgaaagacatgcaaaagcaccactggcagcagccactgtaatt  
gatttagaggagttagcttgaagtcagcgcgggtaaggctaaactgaaaggacaagtttggtagctgctcctcaagccagttacctcggttc  
aaagagttgtagctcagagaacctcgaaaaaccgacctgcaaggcggttttctgtttcagagcaagagattacgcgagacaaaaacgatctca  
agaagatcatcttattaatcagataaaatatttctagattcagtgcaattatctctcaaatgtagcacctgaagtcagccccatacagataaagttg  
tactagtgcttgattctcaccaataaaaaacgccccggcgcaaccgagcgttctgaacaaatccagatggagttctgaggtcattactggatctatca  
acaggagtccaagcgagctcagatatacaattacccccccctgccactcatcgagtagctgtgtaattcattaagcattctcgcagatggaagcca  
tcacaaacggcatgatgaacctgaatgccagcgcatcagcaccttctgccttgctataatattgcccagtgtaaaacggggcggaagaagtt  
gtccatattggccacgtttaatacaaaactggtgaaactcaccagggttggtgagacgaaaaacatattctcaataaacctttagggaaatagg  
ccaggttttacggtaacacgccacatctgcaatatatgtgtagaaactccggaaatcgtcgtggtattcactccagagcagatgaaaacgttcag  
ttgtctcatggaacgggtgaacaagggtgaacactatccatataccagctcaccgtcttctcattgcatatacgaatccggatgagcattcatcag  
gcgggcaagaatgtgaataaaggccggataaaactgtgcttattttctttacggtctttaaaggccgtaatatccagctgaacggtctggttatag  
gtacattgagcaactgactgaaatgcctcaaaatgttctttacgatccattgggatatacaacgggtgatatccagtgattttttctccatttagct  
tccttagctcctgaaaatctcagataactcaaaaaatagccccggtagtgatcttatttattatggtgaaagttggaacctctacgtgccgatcaacgt  
ctcattttcgagatc

pPFL-Nspyc

PFL-Nspyc highlighted in purple; PFL-AE (*pfIA*) highlighted in magenta, MetK highlighted in red.

gacgtctaagaccactttcacatttaagttgttttctaaccgcatatgatcaattcaaggccgaataagaaggctggctctgcaccttggatgac  
ataattcgatagcttgcgtaataatggcggcactatcagtagtaggtgttcccttctctttagcgacttgatgctcttgatctccaatacgcaac  
ctaaagtaaaatgccccacagcgtgagtgcatataatgcattctctagtgaaaaacctgttggcataaaaaggctaattgattttcgagagtttcat  
actgttttctgtaggcgtgtacctaagtacttttctccatcgcatgacttagtaaagcacatctaaaacttttagcgttattacgtaaaaaatctt  
gccagctttcccttctaagggcaaaagtgagtaggtgcctatctaacatctcaatggctaaggcgtcgagcaaaagcccgttatttttcatgcca  
atacaatgtaggctgctacacctagcttctggcgagtttacgggtgttaaaccttcgattccgacctcattaagcagctctaagcgctgtaatca  
ctttacttttataatctagacatcattaattcctaattttgttgacactctatcgttgatagagtattttaccactccctatcagtgatagagaaaaga  
attcaaaagatctttaagaaggagatatacatAGCATTCTGGGCAAAAATAAAATCAAATAGCCTACGCAATGTAGGCTTAAT  
GATTAGTCTGAGTTATATTACGGGGCGTTTTTTAATGCCCGCTTTACATATATTTGCATTAATAAAATAATTGTAA  
TTATAAGGTTAAATATCGGTAATTTGTATTTAATAAATACGATCGATATTGTTACTTTATTCGCCTGATGCTCCCTTT  
TAATTAAGTGTAGCGGAGGATGCGGAAAAAATTCAACTCATTTGTTAATTTTTAAAATTTATTTTTATTTGGATA  
ATCAAATATTTACTCCGTATTTGCATAAAAACCATGCGAGTTACGGGCCTATAAGCCAGGCGAGATATGATCTATA  
TCAATTTCTCATCTATAATGCTTTGTTAGTATCTCGTCGCCGACTTAATAAAGAGAGAGTTAGTGTGAAAAGCTGACA  
ACCTTTTTGATCTTTTACTTCTGCTGCAATGGCCAAAGTGGCCGAAGAGGCGGGTGTCTATAAAGCAACGAAACA  
TCCGCTTAAGACTTTCTATCTGGCGATTACCGCCGGTGTTCATCTCAATCGCATTCTGCTTCTATATCACAGCAAC  
CACTGGCACAGGCACAATGCCCTTCGGCATGGCAAAACTGGTTGGCGGCATTTGCTTCTCTGGGGCTGATTCTT  
TGTGTTGTCTGCGGAGCCGATCTTTACTTCCACCGTGTGATTGTTGTTGCTAAGGCGAGTGGGCGCATCACCT  
GGGGTCAGTTGGCGAAAAACTGGCTAAATGTCTATTTGGCAACCTGGTCGGCGCACTGCTGTTTGTACTTTTAAT  
GTGGCTTTCCGGCGAGTATATGACCGCAAATGGTCAATGGGACTAAACGTCCTACAAACCGCCGACCACAAAAGT  
GCACCATACTTTTATTGAGGCCGTCTGTCTTGGTATCCTGGCAAACCTGATGGTATGTCTGGCAGTATGGATGAGT  
TATTCTGGCCGACGCTGATGGACAAAGCGTTCATTATGGTGTGCGCGTATGTTTGTGCCAGCGTTTTG  
AGCACAGTATCGCAAACATGTTTATGATCCCGATGGGTATTGTAATCCGCGACTTCGCATCCCCGGAATTTGGAC  
CGCAGTCGGTTCTGCACCGGAAAAATTTTCTACCTGACCGTGTGAATTCATCACTGATAACCTGATTCCGGTTA  
CGATCGGCAACATTATCGGTGGTGGTTTGTGGTTGGGTTGACATACTGGGTCATTTACCTGCGTGAAAACGACCA  
CCATTAATGGTTGTCGAAGTACGCAGTAAATAAAAAATCCACTTAAGAAGGTAGGTGTTACATGGATAGTGCTACC  
CATATTAATCTCAAACGTGATGAGGACGGCAAAGAGTTAGCTGGTGCAACTATGGAGTTGCGTGATTTCATCT  
GGTAAAACCTATTAGTACATGGATTTAGATGGACAAGTAAAAGATTTCTACCTGTATCCAGGAAAAATATACATTTG  
TCGAAACCGCAGCACCCAGACGGTTATGAGGTAGCAACTGCTATTACCTTTACAGTTAATGAGCAAGGTGAGGTTAC  
TGTAATGGAGGTAGCGGAGGAAGTAGTGAATTGAACGAGAAAACCTGCAACCGCATGGGAGGGCTTCACGAAG  
GGGGATTGGCAAACGAGGTTAATGTGAGGGATTTTATCCAGAAAAATTATACCATATGAAGGCGATGAATCT  
TTTTAGCCGGTGCAACCGAGGCAACGACGACTTTATGGGATAAGGTTATGGAGGGTGTGAAGTTAGAGAATCGT  
ACACATGCTCCCGTAGATTTGATACTGCAGTGGCGAGTACGATAACTAGCCATGATGCAGGTTATATTAATAAAC  
AATTAGAAAAGATTGTGGGATTACAAACAGAGGCCCTTTAAAGAGAGCACTGATTCTTTTGGCGGAATTAAGA  
TGATTGAGGGAAGCTGTAAGGCTTATAATCGTGAGCTCGACCCTATGATTAAGAAGATTTTACGGAGTATCGGA  
AGACCCATAATCAAGGTGTTTTGATGTGTATACACCTGATATTCTCAGGTGTAGAAAAGAGCGGCGTTTTAACAGG  
CTTACCTGACGCCTACGGTAGAGGACGCATAATTGGCGATTATCGCCGGTTCGCTCTCTATGGAATTGATTATCTC  
ATGAAGGATAAATTAGCCCAATTTACAAGTTTACAAGCAGACTTAGAGAATGGTGTGAATTTAGAGCAAACCATTA  
GACTTCGAGAGGAGATTGCGGAGCAACATCGTGCCTTAGGCCAAATGAAGGAGATGGCAGCAAAGTATGGATAT

GATATATCCGGCCCTGCAACAAATGCACAAGAGGCAATTCAATGGACATATTTTGGTTATCTCGCAGCGGTGAAAT  
CACAAAATGGCGCAGCCATGAGTTTTGGAAGAAGTACACATTTTTAGACGTTTATATTGAGCGGATCTTAAGGC  
GGGTAATAAAGTACGAGGAGGCAAGAGATGGTGGATCATCTTGTATGAAGTTACGCATGGTGCCTTTTT  
ACGGACACCAGAGTATGACGAGCTTTTTTCAGGTGATCTATTTGGGCCACAGAGAGCATTGGCGGAATGGGATT  
GGATGGAAGAACATTAGTACGAAGAATAGTTTTCGCTTTTTAAATACATTATATACGATGGGCCCTAGCCCTGAG  
CCAAATATGACAATCTTATGGAGCGAGAAGCTTCCATTAATTTTTAAAAAGTTTGCTGCAAAGGTTAGTATTGATA  
CTCCAGCTTACAATACGAAAATGACGATTTAATGCGGCCAGATTTAATAATGACGATTATGCAATCGCGTGCTG  
TGTCAGTCCTATGATTGTAGGAAAGCAGATGCAATTTTTGGGGCAAGAGCGAATCTTGCTAAGACTATGTTATAT  
GCCATTAATGGTGGTGTGGATGAGAAGTTAAAGATGCAAGTGGGACCAAAAAGTGAAGCTATTAAGGGTGACGT  
TTTTAAATTACGACGAGTTATGGAACGTATGGACCATTTTATGGATTGGTTAGCCAAGCAATATATTACAGCCTTA  
AATATTATTCATTATATGCATGATAAATATAGTTATGAGGCATCATTAAATGGCCTTACATGATAGAGATGTGATTCC  
TACTATGGCCTGCGGCATAGCGGGCTTAAGTGTGGCAGCAGATAGTCTTAGTGCTATTAAGTACGCTAAGGTGAA  
GCCTATCAGAGATGAGGATGGCTTAGCAATAGATTTTGAATTGAGGGTGAGTATCCACAATTTGGCAATAACGA  
TCCTAGAGTGGACGATTTAGCAGTGGATTTAGTTGAAAGATTTATGAAAAAGATCCAAAAGTTACATACATATCGG  
GATGCAATTCCTACGCAAAGCGTCTTAACAATTACGAGCAATGTGGTTTACGGCAAAAAGACCGGCAATACACCTG  
ATGGGAGAAGGGCAGGGGCCCTTTTTGGGCCAGGCGCAATCCAATGCATGGCAGAGATCAAAAAGGGCGCCGT  
GGCGAGCTTAACATCAGTCGCAAAGTTACCTTCGCCTATGCCAAGGACGGCATTAGCTATACATTTAGCATTGTG  
CCTAATGCGTTAGGCAAGGATGATGAAGTCCGGAAAATAATTTAGCAGGACTCATGGACGGCTATTTTCATCATG  
AGGCCTCAATTGAGGGCGGGCAACATCTTAATGTCAATGTTATGAATAGAGAGATGTTACTTGATGCAATGGAGA  
ATCCTGAGAAGTACCCTCAATTAACAATTCGGGTCTCAGGTTATGCCGTTAGATTTAATCCCTTACCAAGGAGCAA  
CAGCAAGATGTAATCACAAGGACATTTACACAGAGCATGTAATTAGATTTGACTGAAATCGTACAGTAAAAAGCG  
TACAATAAAGGCTCCACGAAAAGTGGGGCCTTTTTTAGCGCGAGAGCCTTTTTGTGAGCTATCTATACTTTAAGGTG  
ACTGCCAAAACAGACTCGACGTAGCCTTCGAGCTGCGCACCAACACGGCCTCAGATGGGCCACATCTGGAGAAAC  
ACCGCAATGTCAGTTATTGGTCGATTCCTCTTTGAATCCTGTGGAACCGTAGACGGCCAGGTATTCGCTTTAT  
CACCTTTTTCCAGGGCTGCCTGATGCGCTGCCTGATTGTCATAACCGCGACACCTGGGACACGCATGGCGGTAAA  
GAAGTTACCGTTGAAGATTTGATGAAGGAAGTGGTACCTATCGCCACTTTATGAACGCTTCCGGCGGGCGGCTT  
ACCGCATCCGGCGGTGAAGCAATCCTGCAAGCTGAGTTTGTTCGTGACTGGTCCGCGCCTGCAAAAAGAAGGC  
ATTCATACCTGTCTGGACACCAACGGTTTTGTTGCTCGTTACGATCCGGTGATTGATGAACTGCTGGAAGTAACCG  
ACCTGGTAATGCTCGATCTCAAACAGATGAACGACGAGATCCACCAAAAATCTGGTTGGAGTTCCAACCACCGCAC  
GCTGGAGTTCGCTAAATATCTGGCGAACAATAATGTGAAGGTGTGGATCCGCTACGTTGTTGTCCAGGCTGGTC  
TGACGATGACGATTCAGCGCATCGCCTCGGTGAATTTACCCGTGATATGGGCAACGTTGAGAAAATCGAGCTTCTC  
CCCTACCACGAGCTGGGCAAGCACAATGGGTGGCAATGGGTGAAGAGTACAACTCGACGGTGTAAACCACC  
GAAGAAAGAGACCATGGAACGCGTGAAAGGCATTCTTGAGCAGTACGGTCATAAGGTAATGTTCTAAtttagagatt  
aaagaggagaaataactagGTGATATTAATATGGCAAAACACCTTTTACGTCCGAGTCCGTCTCTGAAGGGCATCCTGA  
CAAAATTGCTGACCAAAATTTCTGATGCCGTTTTAGACGCGATCCTCGAACAGGATCCGAAAGCACGCGTTGCTTGC  
GAAACCTACGTA AAAACCGGCATGGTTTTAGTTGGCGGCGAAATCACCACCAGCGCCTGGGTAGACATCGAAGAG  
ATCACCCGTAACACCGTTCGCGAAAATGGCTATGTGCATTCCGACATGGGCTTTGACGCTAACTCCTGTGCGGTTCT  
GAGCGCTATCGGCAACAGTCTCCTGACATCAACCAGGGCGTTGACCGTGCCGATCCGCTGGAACAGGGCGCGG  
GTGACCAGGGTCTGATGTTGGCTACGCAACTAATGAAACCGACGTGCTGATGCCAGCACCTATCACCTATGCACA  
CCGTCTGGTACAGCGTCAGGCTGAAGTGCCTAAAAACGGCACTCTGCCGTGGCTGCGCCCGGACGCGAAAAGCC  
AGGTGACTTTTCAGTATGACGACGGCAAAATCGTTGGTATCGATGCTGTCGTGCTTTCCACTCAGCACTCTGAAGA  
GATCGACCAGAAATCGCTGCAAGAAGCGGTAATGGAAGAGATCATCAAGCCAATTCGCCGCTGAATGGCTGAC  
TTCTGCCACCAATTCATCAACCCGACCGGTCGTTTCGTTATCGGTGGCCCAATGGGTGACTGCGGTCTGACTG  
GTCGTA AAAATATCGTTGATACCTACGGCGGCATGGCGCGTCACGGTGGCGGTGCATTCTCTGGTAAAGATCCATC



AAAAGTGGACCGTTCCGCAGCCTACGCAGCACGTTATGTCGCGAAAAACATCGTTGCTGCTGGCCTGGCCGATCG  
TTGTGAAATT CAGGTTTCTACGCAATCGGCGTGGCTGAACCGACCTCCATCATGGTAGAAACTTTCCGTA CTGAG  
AAAGTGCCTTCTGAACA ACTGACCCTGCTGGTACGTGAGTTCTTCGACCTGCGCCATACGGTCTGATT CAGATGC  
TGGATCTGCTGCACCCGATCTACAAAGAAACCGCAGCATACGGTCACTTTGGTCGTGAACATTTCCCGTGGGAAAA  
AACCGACAAAGCGCAGCTGCTGCGCGATGCTGCCGGTCTGAAGTAA TTTCCCGTAAAGCGGCAACTTTATTGAG  
TTGCCGCTTTggatccaaactcgagtaaggatctccaggcatcaaataaaacgaaaggctcagtcgaaagactgggctttctgtttatctgttgtt  
tgtcggatgaacgctcttactagagtcacactggctcaccttcgggtgggctttctcgtttatacctagggatattccgcttctcgtcactgactc  
gctacgctcgggttctgactgcgcgagcggaatggcttacgaacggggcgagatttctggaagatgccaggaagatacctaacagggaagtg  
agaggcgcggaagccgttttccataggtccgccccctgacaagcatcacgaaatctgacgctcaaatcagtggtggcgaaacccgacagg  
actataaagataccaggcgtttccccctggcggctccctcgtcgtctcctgttctgcctttcggttaccgggtcattccgctgttatggcggctttg  
tctcattccacgctgacactcagttccgggtaggcagttcgtccaagctggactgtatgcacgaacccccctcagtcgaccgctgcgcttatcc  
ggaactatcgtcttgagccaacccggaagacatgcaaaagcaccactggcagcagccactggtaattgatttagaggagttagcttgaagtc  
gcgcccgttaaggctaaactgaaaggacaagtttggtagctgcgctcctcaagccagttacctcggttcaagagttggtagctcagagaacctc  
aaaaaccgcccctgcaaggcggttttctgtttcagagcaagagattacgcgcagacaaaacgatctcaagaagatcattattaatcagataaaa  
tatttctagattttagtcaatttatcttcaaatgtagcactgaagtcagccccatacagataaagttgttactagtgcttggattctaccaataaaa  
aacccccggcgcaaccgagcgttctgaacaaatccagatggagttctgaggtcattactggatctatcaacaggagccaagcgagctcagatca  
aattacgccccctgcccactcatcgcagtactgttgaattcattaagcattctgccgacatggaagccatcaciaacggcatgatgaacctgaatc  
gccagcggcatcagcaccttgcgccttgctgataatattgccatgggtgaaaacggggcggaagaagttgtccatattggccacgtttaaatcaaaa  
ctggatgaaactcaccagggttggctgagacgaaaaacatattctcaataaaccttttagggaaataggccaggtttaccgtaaacgccacatc  
ttcgcaatatagtgtagaaactgccgaaatcgtcgtggtattcactccagagcagatgaaaacgtttagttgctcatggaaaacgggtgtaacaagg  
gtgaactatcccatatcaccagctcaccgtctttcattgccatacgaattccggatgagcattcatcaggcgggcaagaatgtaataaaggccg  
gataaaactgtgcttattttctttacggcttttaaaaagccgtaatatccagctgaacggctggttataggtacattgagcaactgactgaaatgcc  
tcaaaatgttctttacgatgccattgggatatacaacgggtgatatccagtgattttttctccatttagcttcttagctcctgaaaatctcgataact  
caaaaatacggccgtagtgatcttattcattatgggtgaaagttggaacctcttagctgccgatcaacgtctcattttcgcagatctc

pPFL-Cspyc

PFL-Cspyc highlighted in purple; PFL-AE (*pfIA*) highlighted in magenta, MetK highlighted in red.

gacgtcttaagaccactttcacatttaagttgttttctaaccgcatatgatcaattcaaggccgaataagaaggctggctctgcaccttggatcaa  
ataattcgatagcttgcgtaataatggcgcatactatcagtagtaggtgttcccttcttcttagcagcttgatgcttccaatacgaac  
ctaaagtaaaatccccacagcgtgagtgcatataatgcattctctagtgaaaaacctgttggcataaaaaggctaattgattttcgagattcat  
actgttttctgtagccgtgtacctaaatgtacttttctccatcgcatgacttagtaagcacatctaaaacttttagcgttattacgtaaaaaatctt  
gccagctttcccttctaaaggcaaaagtgagtaggtgcctatctcaatctcaatggctaaggcgtcgagcaaaagcccgttatttttcatgcc  
atacaatgtaggctgcttacacctagcttctggcgagtttacgggtgttaaaccttcgattccgacctcattaagcagctctaatacgctgtaatac  
ctttacttttctaatctagacatcattaatcctaattttgttgacactctatcgttgatagagttattttaccactccatcagtgatagagaaaaga  
attcaaaagatctttaagaaggagatacatAGCATTCTGGGCAAAAATAAAATCAAATAGCCTACGCAATGTAGGCTTAAT  
GATTAGTCTGAGTTATATTACGGGGCGTTTTTTAATGCCCGCTTTACATATATTTGCATTAATAAAATAATTGTAA  
TTATAAGGTTAAATATCGGTAATTTGATTTAATAAATACGATCGATATTGTTACTTTATTCGCCTGATGCTCCCTTT  
TAATTA ACTGTTTTAGCGGAGGATGCGGAAAAAATTCAACTCATTGTTAATTTTTAAAATTTATTTTTATTTGGATA  
ATCAAAATTTACTCCGATTTGCATAAAAACCATGCGAGTTACGGCCTATAAGCCAGGCGAGATATGATCTATA  
TCAATTTCTCATCTATAATGCTTTGTTAGTATCTCGTCGCCGACTTAATAAAGAGAGAGTTAGTGTGAAAGCTGACA  
ACCCTTTTGATCTTTTACTTCTGCTGCAATGGCCAAAGTGGCCGAAGAGGCGGGTGTCTATAAAGCAACGAAACA  
TCCGCTTAAGACTTTCTATCTGGCGATTACCGCCGGTGTTCATCTCAATCGCATTCTTCTATATCACAGCAAC

CACTGGCACAGGCACAATGCCCTTCGGCATGGCAAACTGGTTGGCGGCATTTGCTTCTCTCTGGGGCTGATTCTT  
TGTGTTGTCTGCGGAGCCGATCTCTTTACTTCCACCGTGTTGATTGTTGTTGCTAAGGCGAGTGGGCGCATCACCT  
GGGGTCAGTTGGCGAAAACTGGCTAAATGTCTATTTTGGCAACCTGGTCGGCGCACTGCTGTTTGTACTTTAAT  
GTGGCTTTCCGGCGAGTATATGACCGCAAATGGTCAATGGGGACTAAACGTCCTACAAACCGCCGACCACAAAGT  
GCACCATACTTTTATTGAGGCCGTCTGTCTTGGTATCCTGGCAAACCTGATGGTATGTCTGGCAGTATGGATGAGT  
TATTCTGGCCGAGCCTGATGGACAAAGCGTTCATTATGGTGTGCCGGTCCGATGTTTGTGTCAGCGGTTTTG  
AGCACAGTATCGCAAACATGTTTATGATCCCGATGGGTATTGTAATCCGCGACTTCGCATCCCCGGAATTTTGGAC  
CGCAGTCGGTTCTGCACCGGAAAAATTTTCTACCTGACCGTGATGAATTCATCACTGATAACCTGATTCCGGTTA  
CGATCGGCAACATTATCGGTGGTGGTTTGTGGTTGGGTTGACATACTGGGTCAATTTACCTGCGTGAAAACGACCA  
CCATTAATGGTTGTGAAGTACGCAGTAAATAAAAAATCCACTTAAGAAGGTAGGTGTTACATGTCGAGCTTAAT  
GAAAAGTTAGCCACAGCCTGGGAAGTTTTACCAAAGGTGACTGGCAGAATGAAGTAAACGTCCTGACTTCATT  
CAGAAAACTACACTCCGTACGAGGGTGACGAGTCCTTCTGGCTGGCGCTACTGAAGCGACCACCACCCTGTGG  
GACAAAGTAATGGAAGGCGTTAACTGGAAAACCGCACTCACGCGCCAGTTGACTTTGACACCGCTGTTGCTTCC  
ACCATCACCTCTCACGACGCTGGCTACATCAACAAGCAGCTTGAGAAAATCGTTGGTCTGCAGACTGAAGCTCCGC  
TGAAACGTGCTTTATCCCGTTCGGTGGTATCAAAATGATCGAAGGTTCTGCAAAGCGTACAACCGCAACTGGA  
TCCGATGATCAAAAAAATCTTCACTGAATACCGTAAAACTCACAACCAGGGCGTGTTGACGTTTTACTCCGGAC  
ATCCTGCGTTGCCGTAATCTGGTGTCTGACCGGTCTGCCAGATGCATATGGCCGTGGCCGTATCATCGGTGACT  
ACCGTCGCGTTGCGCTGTACGGTATCGACTACCTGATGAAAGACAACTGGCACAGTTCACCTCTCTGCAGGCTGA  
TCTGGAAAACGCGTAAACCTGGAACAGACTATCCGTCTGCGCGAAGAAATCGCTGAACAGCACCGCGCTCTGGG  
TCAGATGAAAGAAATGGCTGCGAAATACGGTACGACATCTCTGGTCCGGCTACCAACGCTCAGGAAGCTATCCA  
GTGGACTTACTTCGGCTACCTGGCTGCTGTTAAGTCTCAGAACGGTGCTGCAATGTCCTTCGGTCTGACCTCCACT  
TCCTGGATGTGTACATCGAACGTGACCTGAAAGCTGGCAAGATCACCGAACAAAGAAGCGCAGGAAATGGTTGACC  
ACCTGGTCATGAAACTGCGTATGGTTCGCTTCTGCGTACTCCGGAATACGATGAACTGTTCTCTGGCGACCCGAT  
CTGGGCAACCGAATCTATCGGTGGTATGGGCTCGACGGTCGTACCCTGGTTACCAAAAACAGCTTCCGTTTCTG  
AACACCCTGTACACCATGGGTCCGTCTCCGGAACCGAACATGACCATTCTGTGGTCTGAAAACTGCCGCTGAACT  
TCAAGAAATTCGCCGCTAAAGTGTCCATCGACACCTTCTCTGCAGTATGAGAACGATGACCTGATGCGTCCGGA  
CTTCAACAACGATGACTACGCTATTGCTTGTGCGTAAGCCCGATGATCGTTGGTAAACAAATGCAGTTCCTCGGT  
GCGCGTGCAAACCTGGCGAAAACCATGCTGTACGCAATCAACGGCGGCGTTGACGAAAACTGAAAATGCAGGT  
TGGTCCGAAGTCTGAACCGATCAAAGGCGATGTCCTGAACTATGATGAAGTATGGAGCGCATGGATCACTTCAT  
GGACTGGCTGGCTAAACAGTACATCACTGCACTGAACATCATCCACTACATGCACGACAAGTACAGCTACGAAGCC  
TCTCTGATGGCGCTGCACGACCGTGACGTTATCCGCACCATGGCGTGGTATCGCTGGTCTGTCGTTGCTGCTG  
ACTCCCTGTCTGCAATCAAATATGCGAAAGTAAACCGATTTCGTGACGAAGACGGTCTGGCTATCGACTTCGAAAT  
CGAAGGCGAATACCCGAGTTTGGTAACAATGATCCGCGTGTAGATGACCTGGCTGTTGACCTGGTAGAACGTTT  
CATGAAGAAAATTCAGAACTGCACACCTACCGTGACGCTATCCCAGCTCAGTCTGTTCTGACCATCACTTCTAACG  
TTGTGTATGGTAAGAAAACGGGTAACACCCCAGACGGTCGTGCTGCGCGCCGTTCCGACCGGGTGCTAACCC  
CGATGCACGGTCGTGACCAGAAAGGTGCAGTAGCCTCTCTGACTTCCGTTGCTAAACTGCCGTTTGCTTACGCTAA  
AGATGGTATCTCCTACACCTTCTCTATCGTTCGAAACGCACTGGGTAAGACGACGAAGTTCGTAAGACCAACCTG  
GCTGGTCTGATGGATGGTACTTCCACCACGAAGCATCCATCGAAGGTGGTCAGCACCTGAACGTTAACGTGATG  
AACCGTGAAATGCTGCTCGACGCGATGAAAACCCGAAAAATATCCGAGCTGACCATCCGTGTATCTGGCTAC  
GCAGTACGTTTCAACTCGCTGACTAAAGAACAGCAGCAGGACGTTATTACTCGTACCTTCACTCAATCTATGGGTG  
GATCAGGTGGTAGTGATAGTGTACCCATATTAATTTCTAAAACGTGATGAGGACGGCAAAGAGTTAGCTGGTG  
CAACTATGGAGTTGCGTGATTCATCTGGTAAAATATTAGTACATGGATTCAGATGGACAAGTGAAGATTTCTA  
CCTGTATCCAGGAAAATATACATTTGTGCAAACCGCAGCACCAGACGGTTATGAGGTAGCAACTGCTATTACCTT  
ACAGTTAATGAGCAAGGTGAGGTTACTGTAAATTAATTAGATTTGACTGAAATCGTACAGTAAAAAGCGTACAATA

AAGGCTCCACGAAAGTGGGGCCTTTTTAGCGCGAGAGCCTTTTTGTCAGCTATCTATACTTTAAGGTGACTGCC  
AAAACAGACTCGACGTAGCCTTCGAGCTGCGCACCAACACGGCCTCAGATGGGCCACATCTGGAGAAACACCGCA  
ATGTCAGTTATTGGTCGATTCACTCCTTGAATCCTGTGGAACCGTAGACGGCCAGGTATTCGCTTATCACCTT  
TTCCAGGGCTGCCTGATGCGCTGCCTGTATTGTCATAACCGCGACACCTGGGACACGCATGGCGGTAAAGAAGT  
TACCGTTGAAGATTTGATGAAGGAAGTGGTGACCTATCGCCACTTTATGAACGCTTCCGGCGGCGGCGTTACCGC  
ATCCGGCGGTGAAGCAATCCTGCAAGCTGAGTTGTTGTCGACTGGTTCCGCGCCTGCAAAAAAGAAGGCATTCA  
TACCTGTCTGGACACCAACGGTTTTGTTGTCGTTACGATCCGGTGATTGATGAACTGCTGGAAGTAACCGACCTG  
GTAATGCTCGATCTCAAACAGATGAACGACGAGATCCACCAAATCTGGTTGGAGTTCCAACCACCGCACGCTGG  
AGTTCGCTAAATATCTGGCGAACAAAAATGTGAAGGTGTGGATCCGCTACGTTGTTGCCAGGCTGGTCTGACG  
ATGACGATTACGCGCATCGCTCGGTGAATTTACCCGTGATATGGGCAACGTTGAGAAAATCGAGCTTCTCCCTA  
CCACGAGCTGGGCAAGCACAAATGGGTGGCAATGGGTGAAGAGTACAACTCGACGGTGTTAAACCACCGAAGA  
AAGAGACCATGGAACCGGTGAAAGGCATTCTTGAGCAGTACGGTCATAAGGTAATGTTCTAAtttagagattaagagg  
agaaatactagGTGATATTAATATGGCAAAACACCTTTTACGTCCGAGTCCGCTCTGAAGGGCATCCTGACAAAA  
TGCTGACCAAATTTCTGATGCCGTTTTAGACGCGATCCTCGAACAGGATCCGAAAGCACGCGTTGCTTGCGAAACC  
TACGTA AAAACCGGCATGGTTTTAGTTGGCGGCGAAATCACCACCAGCGCCTGGGTAGACATCGAAGAGATCACC  
CGTAACACCGTTCGCGAAATTGGCTATGTGCATTCCGACATGGGCTTTGACGCTAACTCCTGTGCGGTTCTGAGCG  
CTATCGGCAAACAGTCTCCTGACATCAACCAGGGCGTTGACCGTGCCGATCCGCTGGAACAGGGCGCGGGTGACC  
AGGGTCTGATGTTTGGCTACGCAACTAATGAAACCGACGTGCTGATGCCAGCACCTATCACCTATGCACACCGTCT  
GGTACAGCGTCAGGCTGAAGTGCCTAAAAACGGCACTCTGCCGTGGCTGCGCCCGACGCGAAAAGCCAGGTGA  
CTTTTACAGTATGACGACGGCAAAATCGTTGGTATCGATGCTGTCGTGCTTCCACTCAGCACTCTGAAGAGATCGA  
CCAGAAATCGCTGCAAGAAGCGGTAATGGAAGAGATCATCAAGCCAATTCTGCCCGCTGAATGGCTGACTTCTGC  
CACCAAATTTCTCATCAACCCGACCGGTCGTTTCGTTATCGGTGGCCCAATGGGTGACTGCGGTCTGACTGGTCGT  
AAAATTATCGTTGATACCTACGGCGGCATGGCGCGTCACGGTGGCGGTGCATTCTCTGGTAAAGATCCATCAAAA  
GTGGACCGTTCGCGAGCCTACGACGACGTTATGTCGCGAAAAACATCGTTGCTGCTGGCCTGGCCGATCGTTGTG  
AAATTCAGGTTTCTACGCAATCGGCGTGGCTGAACCGACCTCCATCATGGTAGAACTTTCGGTACTGAGAAAGT  
GCCTTCTGAACAACCTGACCTGCTGGTACGTGAGTTCTTCGACCTGCGCCCATACGGTCTGATTAGATGCTGGAT  
CTGCTGCACCCGATCTACAAAGAAACCGCAGCATACGGTCACTTTGGTCGTGAACATTTCCCGTGGGAAAAACCG  
ACAAAGCGCAGCTGCTGCGCGATGCTGCCGGTCTGAAGTAAATTTCCCGTAAAGCGGCAACTTTATTGAGTTGCCG  
CTTTggatccaaactcgagtaaggatcaccagcatcaataaaaacgaaaggctcagtcgaaagactggcctttctgtttatctgttgttgcggtg  
aacgctctactagagtcacactggctcaccttcgggtgggctttctcggtttatactagggatatattccgcttctcgtcactgactcgctacgct  
cggtcgttcgactcgccgagcggaaatggcttacgaacggggcggagatttctggaagatgccaggaagataactaacagggaaagtgagagggc  
cgcggaagccgttttccataggtcgcggcctgacaagcatcacgaaatctgacgctcaaatcagtggtggcgaaacccgacaggactataa  
agataccaggcgtttcccctggcggctcctcgtgctcctcgttctcgttctcgttaccggtgtcattccgctgttatggcggcgtttgtctcatt  
ccagcctgacactcagttccgggtaggcagttcgtccaagctggactgtatgcacgaacccccgttcagtcgaccgctgccttatccgtaac  
tatcgtcttgagccaaccggaagacatgcaaaagcaccactggcagcagccactggtaattgatttagaggagtagtctgaagtcacgccc  
gtaaggctaaactgaaaggacaagtttgggtgactgcgctcctcaagccagttacctcggtcaagagttggtagctcagagaacctcgaaaa  
ccggcctgcaaggcggttttctgtttcagagcaagagattacgcgacacaaaacgatcacaagaagatcatcttataatcagataaaatattct  
agattcagtgcaattatctctcaaatgtagcactgaagtcagccccatacagataaagttgtagctgctggattctaccaataaaaaacgc  
ccggggcaaccgagcgttctgaacaaatccagatggagttctgaggtcattactggatctatcaacaggagtcgaagcagctcgatcaaatc  
gccccctgccactcatcgactgttgaattcattaagcattctgccgacatggaagccatcacaacggcatgatgaacctgaatcgccagc  
ggcatcagcactgtcgccttgcgtataatattgccatggtgaaacggggcgaaagttgtccatattggccacgtttaaatcaaaactggg  
aaactaccagggttggctgagacgaaaaacatattctcaataaaccttagggaaataggccaggtttaccgtaacacgccacatcttgcga  
atatatgtgtagaaactcgggaaatcgtcgtggtattcactccagagcagatgaaacgtttcagtttgctcatggaacgggtgaacaagggtgaa  
cactatccatataccagctcaccgtctttcattgccatacgaattccggatgagcattcatcaggcgggcaagaatgtaataaaggccgataa

aactgtgcttatttttctttacggtcttataaaaggccgtaatatccagctgaacggtctggttataggtacattgagcaactgactgaaatgcctcaaa  
atgttctttacgatgccattgggatatacaacggtggtatatccagtgattttttctcatttagcttcttagctcctgaaaatctcgataactcaaaa  
aatacggccggtagtgatcttatttcattatggtgaaagttggaacctctacgtgccgatcaacgtctcattttcgccagatc

pEUTD-Nsnpc

EUTD-Nsnpc highlighted in yellow; ACK highlighted in grey

ccgaataagaaggctggctcgcaccttggtgatcaataattcgatagcttgcgtaataatggcggcactatcagtagtaggtttccctttctt  
tttagcacttgatgctcttgatctccaatacgcacctaagtaaaatgccccacagcgtgagtgcatataatgattctctagtgaaaaacctgt  
tggcataaaaaggctaattgattttcgagagtttcactggttttctgtaggcccgtgacctaagtacttttgcctatcgcatgacttagtaaagca  
catctaaaacttttagcgttattacgtaaaaaatcttgccagctttcccttctaaagggcaaaagtgagatggtgcctatcaacatctcaatggcta  
aggcgtcgagcaaaagcccgttatttttcatgccaatacaatgtaggctgctctacacctagcttctggcgagtttacgggtttaaacctcgatt  
ccgaccttaagcagctctaatgcgctgtaatacctttactttatctaatctagacatcattaattcctaattttgtgacactctatcgttgataga  
gtattttaccactccctatcagtgatagagaaaagaattcaaaagatctttaagaaggagatatacatATGAAGCCGCTGCGTGGTGCCG  
TGTTTAGCCTGCAGAAACAGCATCCCAGACTATCCCGATATCTATGGCGCGATTGATCAGAATGGGACCTATCAAAA  
TGTGCGTACCGGCGAAGATGGTAAACTGACCTTTAAGAATCTGAGCGATGGCAAATATCGCCTGTTGAAAATAG  
CGAACCCGCTGGCTATAAACCGGTGCAGAATAAGCCGATTGTGGCGTTTCAGATTGTGAATGGCGAAGTGCCTGA  
TGTGACCAGCATTGTGCCGAGGATATCCGGCTACATATGAATTTACCAACGGTAAACATTATATACCAATGAA  
CCGATACCGCGAAAGGAGGTAGCGGAGGAAGTATCATCGAAAGATGCAGAGAGTTAGCATTACGTGCACCTGC  
ACGCGTTGTGTTCCCTGACGCCCTGGATCAGCGCGTTTTAAAGGCAGCACAGTACCTGCACCAGCAGGGCTTAGCC  
ACACCAATCTTAGTGGCAAACCTTTTCGAGTTAAGACAATTCGCCTTATCACATGGTGTGGCCATGGATGGCCTTCA  
AGTTATCGACCCTCACGGTAATTTAGCCATGCGCGAGGAGTTCGCACACCGTTGGTTAGCACGTGCAGGTGAGAA  
GACCCCTCCTGACGCATTAGAGAAGTTAACGGATCCGTTAATGTTTGCCGAGCCATGGTGTGAGCAGGCAAGGC  
CGACGTGTGCATTGCAGGTAATTTAAGCAGTACCGCAACGTTTTAAGAGCAGGTCTGAGAATCATTGGTCTCCAA  
CCTGGTTGCAAGACCTAAGCAGCATCTTTTTAATGCTTCTCAATATTCAGGACCTGCCCTTGGTTTCGCAGACTG  
TTCTGTCTGTTCTCAACCTACAGCCGCACAATTAGCAGACATTGCCTTAGCAAGCGCAGAGACATGGAGAGCAATT  
ACAGGCGAGGAACCTAGAGTTGCCATGTTAAGTTTCAGTTCTAACGGCTCAGCAAGACATCCGTGCGTGGCAAAT  
GTGCAACAAGCCACCGAGATTGTGCGAGAACGTGCCCTAAATTAGTTGTTGACGGTGAAGTGAATTCGATGCA  
GCATTTGTTCTGAGGTTGCCGCACAGAAGGCCCCAGCGTCACCTTTGCAAGGTAAAGCAAACGTTATGGTGTTC  
CTAGCTTAGAGGCAGGCAACATCGGCTATAAGATTGCCAGAGGTTAGGTGGCTACAGAGCAGTGGGCCCTTTAA  
TCCAGGGCTTGGCAGCCCCTATGCATGACTTGAAGCAGAGGCTGCTCTGTCCAAGAGATCATTGAATTAGCCTTGGT  
TGCCGAGTCCCAGACAAACCGAGGTTAATAGAGAGTCATCCCTGCAGACCTTAGTGGAGTAActggttattttaaaa  
accaacttactcaggtccatacccagaaaatccagcttaaagctgacatatctagaaaattttcacattctaacgggagataccagaacaATG  
TCGAGTAAGTTAGTACTGGTTCTGAACTGCGGTAGTTCTTCACTGAAATTTGCCATCATCGATGCAGTAAATGGTG  
AAGAGTACCTTTCTGGTTAGCCGAATGTTTCCACCTGCCCGAAGCACGTATCAAATGGAAAATGGACGGCAATAA  
ACAGGAAGCGGCTTAGGTGCAGGCGCCGCTCACAGCGAAGCGCTCAACTTTATCGTTAATACTATTCTGGCACAA  
AAACCAGAACTGTCTGCGCAGCTGACTGCTATCGGTACCGTATCGTACACGGCGGCGAAAAGTATACCAGCTCC  
GTAGTGATCGATGAGTCTGTTATTCAGGGTATCAAAGATGCAGCTTCTTTTGACCGCTGCACAACCCGGCTCACC  
TGATCGGTATCGAAGAAGCTCTGAAATCTTCCACAGCTGAAAGACAAAACGTTGCTGTATTTGACACCGCGTT  
CCACCAGACTATGCCGGAAGAGTCTTACCTCTACGCCCTGCCTTACAACCTGTACAAAGAGCACGGCATCCGTCGT  
TACGGCGCGCACGGCACCGCACTTCTATGTAACCCAGGAAGCGGCAAAAATGCTGAACAAACCGGTAGAAGA  
ACTGAACATCATCACCTGCCACCTGGGCAACGGTGGTTCCGTTTCTGCTATCCGCAACGGTAAATGCGTTGACACC  
TCTATGGGCCTGACCCCGCTGGAAGGTCTGGTCATGGGTACCCGTTCTGGTGATATCGATCCGGCGATCATCTCC

ACCTGCACGACACCCTGGGCATGAGCGTTGACGCAATCAACAAACTGCTGACCAAAGAGTCTGGCCTGCTGGGTC  
TGACCGAAGTGACCAGCGACTGCCGCTATGTTGAAGACAACACTACGCGACGAAAGAAGACGCGAAGCGCGCAATG  
GACGTTTACTGCCACCGCCTGGCGAAATACATCGGTGCCTACACTGCGCTGATGGATGGTCGTCTGGACGCTGTTG  
TATTCACTGGTGGTATCGGTGAAAATGCCGCAATGGTTCGTGAACTGTCTCTGGGCAAACCTGGGCGTGTGGGCT  
TTGAAGTTGATCATGAACGCAACCTGGCTGCACGTTTCGGCAAATCTGGTTTCATCAACAAAGAAGGTACCCGTCC  
TGCGGTGGTTATCCCAACCAACGAAGAACTGTTATCGCGCAAGACGCGAGCCGCTGACTGCCTAAAggatccaaact  
cgagtaaggatctccaggcatcaataaaacgaaaggctcagtcgaaagactgggcctttcgtttatctgttgttgcggtgaacgctctactaga  
gtcacactggctcaccttcgggtggcctttctgcgtttatcctagggcgttcggctcggcgagcggtatcagctcactcaaaggcgtaatacggtt  
atccacagaatcaggggataacgcaggaaagaacatgtgagcaaaaggccagcaaaaggccaggaaccgtaaaaaggccgcttgcggtttt  
tccataggctcggccccctgacgagcatcaaaaaatcgacgtcaagtcagaggtggcgaaacccgacaggactataaagataaccaggcgtttcc  
ccctggaagctccctcgtgcctctcgttccgaccctcggcctaccggatacctgtccgctttctcccttcgggaagcgtggcgtttctcatagctc  
acgctgtaggtatctcagttcgggtgtaggtcgttcgctcaagctgggctgtgtgcacgaacccccgttcagcccagcgtgcgcttatccgtaac  
tatcgtcttgagccaaccgtaagacacgacttatcgccactggcagcagccactggtaacaggattagcagagcaggtatgtaggcgggtctac  
agagttctgaagtggtggcctaactacggctacactagaaggacagtatttggtatctgcgctctgctgaagccagttaccttcggaagagagttgg  
tagctcttgatcggcaaacaaaccacgctggtagcgggtgtttttttgttgaagcagcagattacgcgcaaaaaaaggatctcaagaagatc  
ctttgatctttctacggggtcagcgtcagtggaacgaaaactcacgttaagggttttggctcatgactagtgcttggattctaccaataaaaaacg  
ccggcggaaccgagcgttctgaacaaatccagatggagttctgaggtcattactggatctatcaacaggagtccaagcagctctcgaacccag  
agtcccgctcagaagaactcgtcaagaaggcgatagaaggcgtgcgctcgaatcgggagcggcgataaccgtaaagcagaggaagcgggtcagc  
ccattcggccaagctctcagcaatcacgggtagccaacgctatgtcctgatagcggctccgccacaccagccggccacagctgatgaatccag  
aaaagcggccattttccacatgatattcggcaagcaggcatcgccatgggtcacgacgagatcctcgccgctgggcatcgcgcttgagcctggcg  
aacagttcggctggcgagcccctgatgctctcgtccagatcatcctgatcgacaagaccggtccatccgagtagctgctcgtcgtcagatggt  
tcgcttggtggtcgaatgggcaggtgacgggatcaagcgtatgacgcccattgcatcagccatgatggatactttctggcaggagcaaggtga  
gatgacaggagatctgccccggcacttcgccaatagcagccagtccttcccgttcagtgacaactcgagcacagctgcgcaaggaacgccccg  
tcgtggccagccagatagccgctgctcgtcctgagttcattcagggcaccggacaggtcggcttgacaaaaagaacggggcgcccctgcgt  
gacagccggaacacggcgcatcagagcagccgattgtctgttggccagtcagccgaatagcctctccaccaagcggccggagaacctgcgt  
gcaatccatctgttcaatcatcgaaacgatcctatcctgtctcttgatcagatcatgatcccctgcgcatcagatccttggcggaagaaagccat  
ccagttactttgagggttcccaaccttaccagagggcgccccagctggcaattccgacgtcttaagaccactttcacatthaagttgttttcta  
cgcatataatcaatcaagg

pEUTD-Csnpc

EUTD-Csnpc highlighted in yellow; ACK highlighted in grey

ccgaataagaaggctggctcgcaccttggtgatcaataattcgatagcttgcgtaataatggcgcatactatcagtagtaggtgtttccctttctt  
tttagcgactgatgctcttgatcttccaatacgaacctaaagtaaaatgccccacagcgtgagtgcatataatgattctctagtgaaaaactgt  
tggcataaaaaggctaattgattttcagagagttcactactgttttctgtaggcgtgtacctaataatgacttttctccatcgcatgacttagtaagca  
catctaaaacttttagcgttattacgtaaaaaatcttgccagcttcccttctaaagggcaaaagtgagtaggtgcttactaactctcaatggcta  
aggcgtcgagcaaacggccttatttttacatgccaatacaatgtaggtgctctacacctagcttctggcgagtttacgggttgttaaccttcgatt  
ccgacctcattaagcagctctaagcgtgtaatacctttactttatctaatctagacatcattaattcctaattttgtgactctatcgttgataga  
gttattttaccactccctatcagtgatagagaaaagaattcaaaagatctttaagaaggagatatacatATGATCATCGAAAGATGCAGAG  
AGTTAGCATTACGTGCACCTGCACGCGTTGTGTTCCCTGACGCCCTGGATCAGCGCGTTTTAAAGGCAGCACAGTA  
CCTGCACCAGCAGGGCTTAGCCACACCAATCTTAGTGGAACCCCTTTCGAGTTAAGACAATTCGCTTATCACAT  
GGTGTGGCCATGGATGGCCTTCAAGTTATCGACCCTCACGGTAATTTAGCCATGCGCGAGGAGTTCGCACACCGTT  
GGTTAGCACGTGCAGGTGAGAAGACCCCTCCTGACGCATTAGAGAAGTTAACGGATCCGTTAATGTTTGCCGAG

CCATGGTGT CAGCAGGCAAGGCCGACGTGTGCATTGCAGGTAATTTAAGCAGTACCGCCAACGTTTTAAGAGCAG  
GTCTGAGAATCATTGGTCTCCAACCTGGTTGCAAGACCTTAAGCAGCATCTTTTTAATGCTTCTCAATATTCAGGA  
CCTGCCCTTGGTTTCG CAGACTGTTCTGTCTTCAACCTACAGCCGCACAATTAGCAGACATTGCCTTAGCAAG  
CGCAGAGACATGGAGAGCAATTACAGGCGAGGAACCTAGAGTTGCCATGTTAAGTTTCAGTTCTAACGGCTCAGC  
AAGACATCCGTGCGTGGCAAATGTGCAACAAGCCACCGAGATTGTGCGAGAACGTGCCCTAAATTAGTTGTTGA  
CGGTGAACTGCAATTCGATGCAGCATTGTTCTGAGGTTGCCGCACAGAAGGCCCCAGCGTCACCTTTCGAAGGT  
AAAGCAAACGTTATGGTGTTCCTAGCTTAGAGGCAGGCAACATCGGCTATAAGATTGCCAGAGGTTAGGTGGC  
TACAGAGCAGTGGGCCCTTAATCCAGGGCTTGGCAGCCCCTATGCATGACTTGAGCAGAGGCTGCTCTGTCCAA  
GAGATCATTGAATTAGCCTTGGTTGCCG CAGTCCCCAGACAAACCGAGGTTAATAGAGAGTCATCCCTGCAGACCT  
TAGTGGAGGGTGGATCAGGTGGTAGTAAGCCGCTGCGTGGTGCCGTGTTAGCCTGCAGAAACAGCATCCC GACT  
ATCCCGATATCTATGGCGCGATTGATCAGAATGGGACCTATCAAATGTGCGTACCGGCCAAGATGGTAAACTGA  
CCTTTAAGAATCTGAGCGATGGCAAATATCGCCTGTTGAAAATAGCGAACCCGCTGGCTATAAACCGGTGCAGA  
ATAAGCCGATTGTGGCGTTTCAGATTGTGAATGGCGAAGTGC GTGATGTGACCAGCATTGTGCCGCAGGATATTC  
CGGTACATATGAATTTACCAACGGTAAACATTATACCAATGAACCGATACCGCCGAAATAA tctggttat ttttaaaa  
accacatttactcaggtccatacccgagaaaatccagctaaagctgacatatctaggaaaat tttcacattctaacgggagataccagaacaATG  
TCGAGTAAGTTAGTACTGGTTCTGAACTGCGGTAGTTCTTCACTGAAATTTGCCATCATCGATGCAGTAAATGGTG  
AAGAGTACCTTTCTGGTTTAGCCGAATGTTCCACCTGCCGGAAGCACGTATCAAATGGAAAATGGACGGCAATAA  
ACAGGAAGCGGCTTAGGTGCAGGCGCCGCTCACAGCGAAGCGCTCAACTTTATCGTTAATACTATTCTGGCACAA  
AAACCAGAACTGTCTGCGCAGCTGACTGCTATCGGTACCGTATCGTACACGGCGGCGAAAAGTATAACCAGCTCC  
GTAGTGATCGATGAGTCTGTTATTCAGGGTATCAAAGATGCAGCTTCTTTGCACCGCTGCACAACCCGGCTCACC  
TGATCGGTATCGAAGAAGCTCTGAAATCTTCCACAGCTGAAAGACAAAAACGTTGCTGTATTTGACACCGCGTT  
CCACCAGACTATGCCGGAAGAGTCTTACCTTACGCCCTGCCTTACAACCTGTACAAAGAGCACGGCATCCGTCGT  
TACGGCGCGCACGGCACCCAGCCACTTCTATGTAACCCAGGAAGCGGCAAAAATGCTGAACAAACCGGTAGAAGA  
ACTGAACATCATCACCTGCCACCTGGGCAACGGTGGTTCCGTTTCTGCTATCCGCAACGGTAAATGCGTTGACACC  
TCTATGGGCTGACCCGCTGGAAGGTCTGGTCATGGGTACCCGTTCTGGTGATATCGATCCGGCGATCATCTTCC  
ACCTGCACGACACCCTGGGCATGAGCGTTGACGCAATCAACAACTGCTGACCAAAGAGTCTGGCCTGCTGGGTC  
TGACCGAAGTGACCAGCGACTGCCGCTATGTTGAAGACAACCTACGCGACGAAAGAAGACGCGAAGCGCGCAATG  
GACGTTTACTGCCACCGCCTGGCGAAATACATCGGTGCCTACACTGCGCTGATGGATGGTCGTCTGGACGCTGTTG  
TATTCAGTGGTGGTATCGGTGAAAATGCCGCAATGGTTCGTGAACTGTCTCTGGGCAAACTGGGCGTGTGGGCT  
TTGAAGTTGATCATGAACGCAACCTGGCTGCAGTTTCGGCAAATCTGGTTTATCAACAAAGAAGGTACCCGTCC  
TGCGGTGGTTATCCCAACCAACGAAGA ACTGGTTATCGCGCAAGACGCGAGCCGCTGACTGCCTAAggatccaaact  
cgagtaaggatctccaggcatcaataaaaacgaaaggctcagtcgaaagactgggcctttcgttttatctgtttgtcgggtgaacgctctactaga  
gtcacactggctcaccttcgggtgggcctttctgctttatacctaggcggtcggctgcgcgagcggtatcagctcactcaaaggcggtaatacggtt  
atccacagaatcaggggataacgcaggaaagaacatgtgagcaaaaggccagcaaaaggccaggaaccgtaaaaaggccggtgctggcgtttt  
tccataggctccgccccctgacgagcatcaaaaaatcgacgctcaagtcaaggtggcgaaaccgacaggactataaagataccaggcgtttcc  
ccctggaagctccctcgtgcgctctcgttccgaccctgccgcttaccggatacctgtccgctttctcccttgggaagcgtggcgtttctcatagctc  
acgctgtaggtatctcagttcgggtgtaggtcgttctgctcaagctgggctgtgtgcacgaacccccgttcagcccagccgctgcgcttatccggtaac  
tatcgtcttgagccaaccggtaagacacgacttatgccactggcagcagccactggtaacaggattagcagagcgaggatgtaggcggtgctac  
agagttctgaagtggtggcctaactacggctacactagaaggacagtatttggtatctgctctgctgaagccagttaccttcggaagagagttgg  
tagctcttgatccgcaaacaaaccaccgctggtagcgggtggtttttgtttgcaagcagcagattacgcgcaaaaaaaggatctcaagaagatc  
ctttgatctttctacggggtctgacgctcagtggaacgaaaactcagtttaagggttttggtcatgactagtgttgattctcaccaataaaaaacg  
cccggcggaaccgagcgttctgaacaaatccagatggagttctgaggtcattactggatctatcaacaggagtccaagcgagctctgaaaccag  
agtcggctcagaagaactcgtcaagaaggcgatagaaggcgatgcgctgcgaatcgggagcggcgataccgtaaagcagaggaagcggctcagc  
ccattcggccaagctctcagcaatatcacgggtagccaacgctatgtcctgatagcggctccccacaccagccggccacagtcgatgaatccag

aaaagcggcattttccacatgatattcggaagcaggcatcgccatgggtcacgacgagatcctcgccgtcgggcatgcgpccttgagcctggcg  
aacagttcggctggcgcgagcccctgatgctcttcgtccagatcatcctgatcgacaagaccggcttccatccgagtacgtgctcgcctgatgcgatgtt  
tcgcttgggtggtcgaatgggcaggtagccggatcaagcgtatgcagccgcccattgcatcagccatgatggatactttctcggcaggagcaaggtga  
gatgacaggagatcctgccccggcacttcgccaatagcagccagtccttcccgttcagtgacaacgtcgagcacagctgcgcaaggaacgcccg  
tcgtggccagccacgatagccgcgtgcctcgtcctgcagttcattcagggcaccggacaggtcggcttgacaaaaagaaccggcgcccctgcgct  
gacagccggaacacggcgcatcagagcagccgattgtctgttgccagtcatagccaatagcctctccaccaagcggcggaacactgcgt  
gcaatccatctgttcaatcatcgaaacgatcctcctcctgtccttgatcagatcatgatcccctgcgcatcagatccttggcggcaagaaagccat  
ccagtttactttgcagggttcccaaccttaccagagggcgccccagctggcaattccgacgtttaagaccctttcacatttaagttgttttctaac  
cgatataatcaattcaagg
